# Supplementary material for: A machine learning approach toward generating the focused molecule library targeting CAG repeat DNA
Source: Royal Society of Chemistry journal article supplement (doi:10.1039/d3dd00160a), 2024-01-01
Supplement: d3dd00160a1.pdf [file d3dd00160a1.pdf]

Supporting information

## Machine learning approach toward generating the focused molecule library targeting CAG repeat DNA

Qingwen Chen,<sup>a</sup> Takeshi Yamada,<sup>a,c</sup> Asako Murata,<sup>a,d</sup> Ayako Sugai,<sup>a</sup> Yasuyuki Matsushita,<sup>b</sup> and Kazuhiko Nakatani<sup>a\*</sup>

<sup>a</sup>SANKEN (The Institute of Scientific and Industrial Research), Osaka University, 8-1 Mihogaoka, Ibaraki 567-0047, Japan. E-mail: nakatani@sanken.osaka-u.ac.jp

<sup>b</sup>Graduate School of Information Science and Technology, Osaka University, 1-5 Yamadaoka, Suita 565-0871, Japan. E-mail: yasumat@ist.osaka-u.ac.jp

<sup>c</sup>Current address: Nucleotide and Peptide Drug Discovery Center, Tokyo Medical and Dental University, 1-5-45 Yushima, Bunkyo-ku, Tokyo 113-8519, Japan.

<sup>d</sup>Current address: Department of Material Sciences, Faculty of Engineering Sciences, Kyushu University, 6-1 Kasuga-koen, Kasuga, Fukuoka 816-8580, Japan.

### Contents

|                       |       |    |
|-----------------------|-------|----|
| Supporting Figures    | ----- | 2  |
| Supporting Tables     | ----- | 9  |
| Materials and Methods | ----- | 11 |
| References            | ----- | 13 |
| Appendix A            | ----- | 14 |
| Appendix B            | ----- | 15 |
| Acknowledgements      | ----- | 27 |

## Supporting Figures

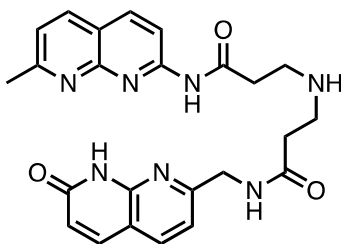

**Fig. S1** The structure of **NA.1**

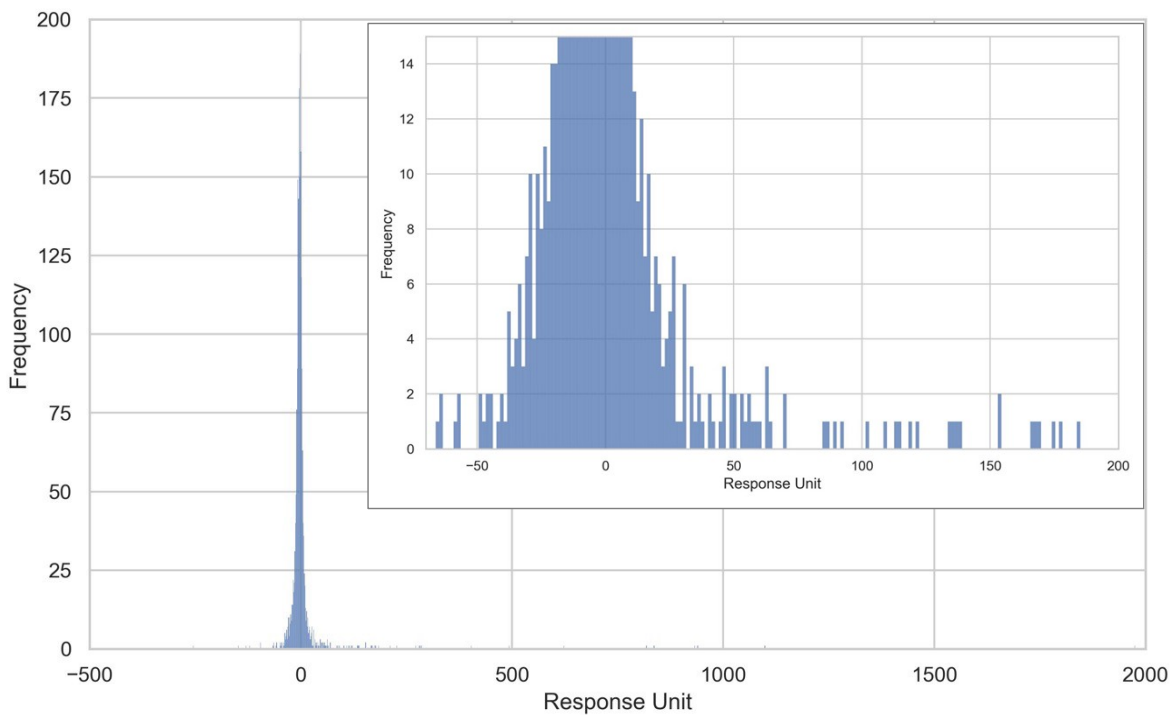

**Fig. S2** A skew distribution of SPR response units for 2000 small molecules. Response strength for most molecules is near zero, suggesting these are likely non-hits. An enlarged plot is displayed in the top right for detailed viewing.

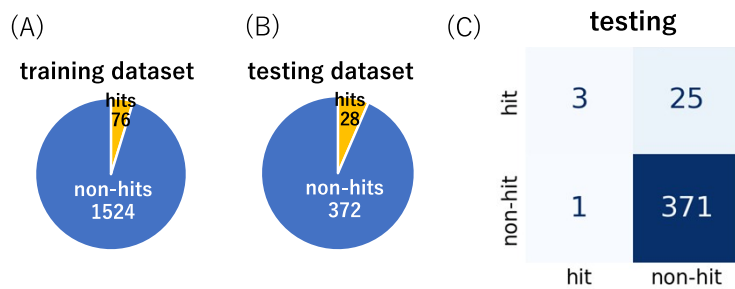

**Fig. S3** The binary classification confusion matrixes in the initial classification. The data proportion of (A) training dataset and (B) testing dataset. (C) The confusion matrix of the classification results of the testing dataset.

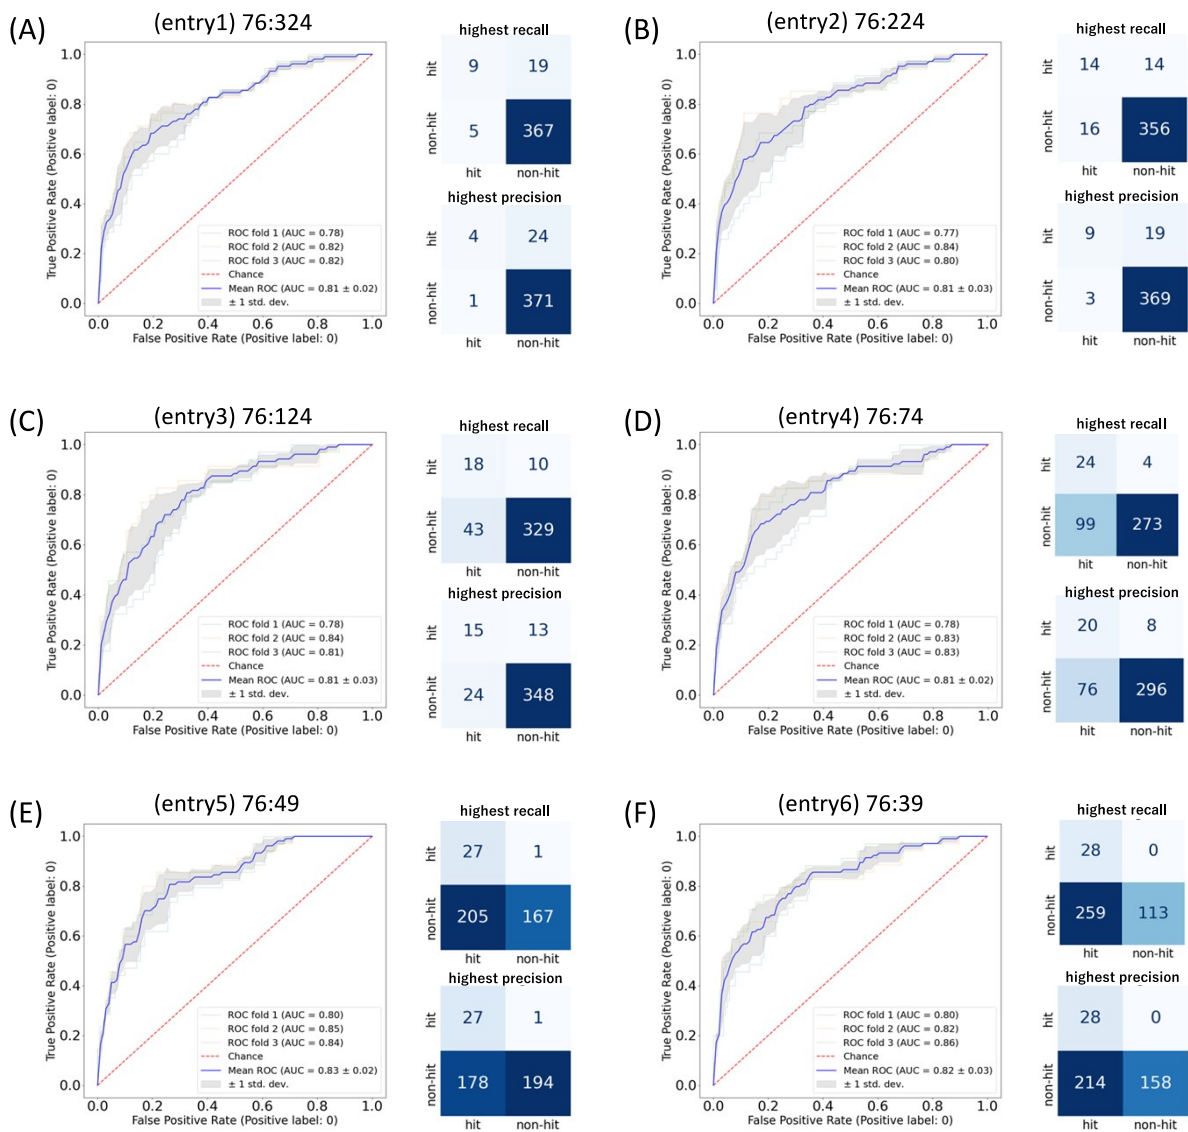

**Fig. S4** (A-F) The binary classification results in 6 different hits/non-hits ratios (figure title on the left) in the training dataset with down-sampling, the same as Table S3. In each classification result, the ROC curve was shown on the left. The confusion matrix with the highest recall was shown in the upper right, and the highest precision in the bottom right.

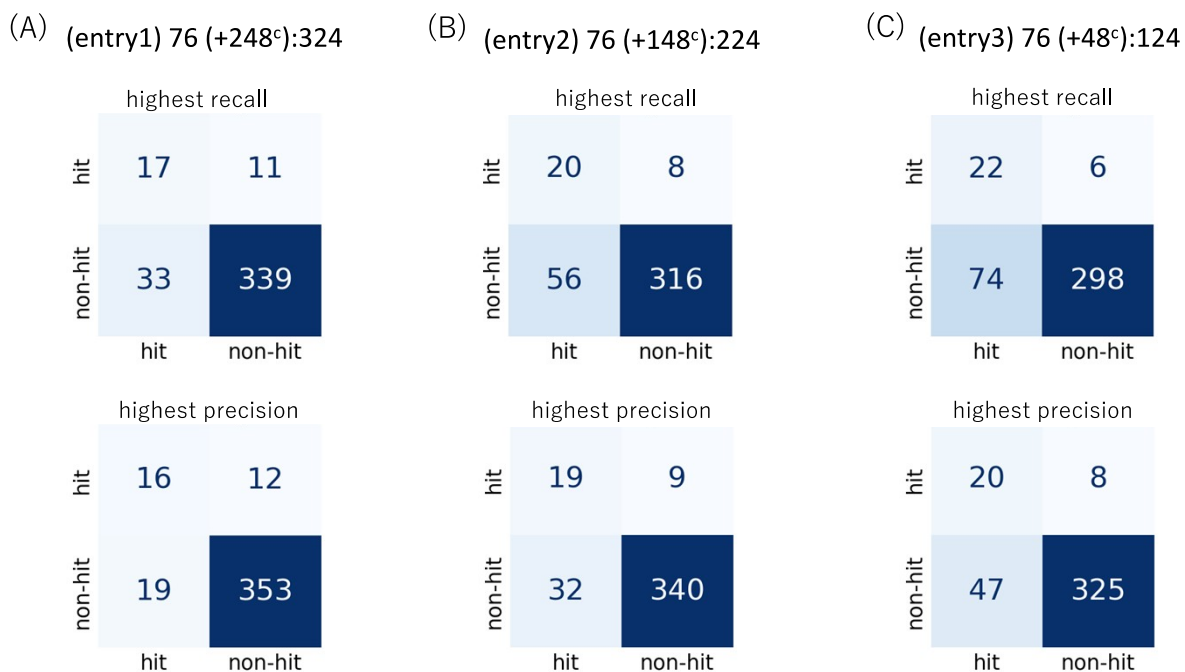

**Fig. S5** (A-C) The binary classification results in 3 different hits/non-hits ratios in the training dataset with oversampling, (the “+” indicates oversampled hit counts. <sup>c</sup>Non-hits dropped in the whole dataset.) the same as Table S4. In each classification result, the confusion matrix with the highest recall was shown in the upper part, and the highest precision in the bottom.

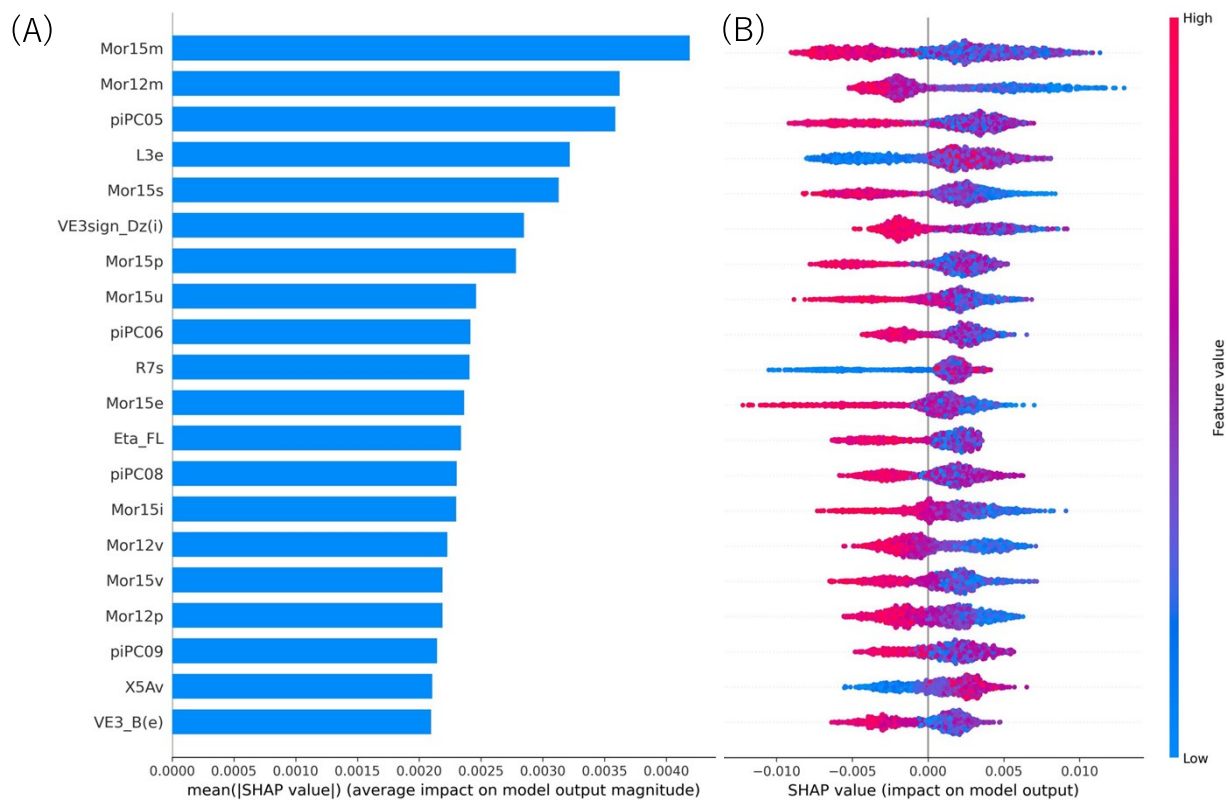

**Fig. S6** The classification is the same as Table S3, entry 4. The top 20 features rank on (A) global SHAP value and (B) local beeswarm plot. Each instance (here is the molecule) of the dataset appears as its point for each variable. The vertical location is related to the feature's name, as shown in the y-axis. The red and blue colors correspond to each molecule's original descriptor values. Horizontal location indicates a negative or positive prediction with the SHAP value. And the vertical width will increase when data points have a high-density SHAP value.

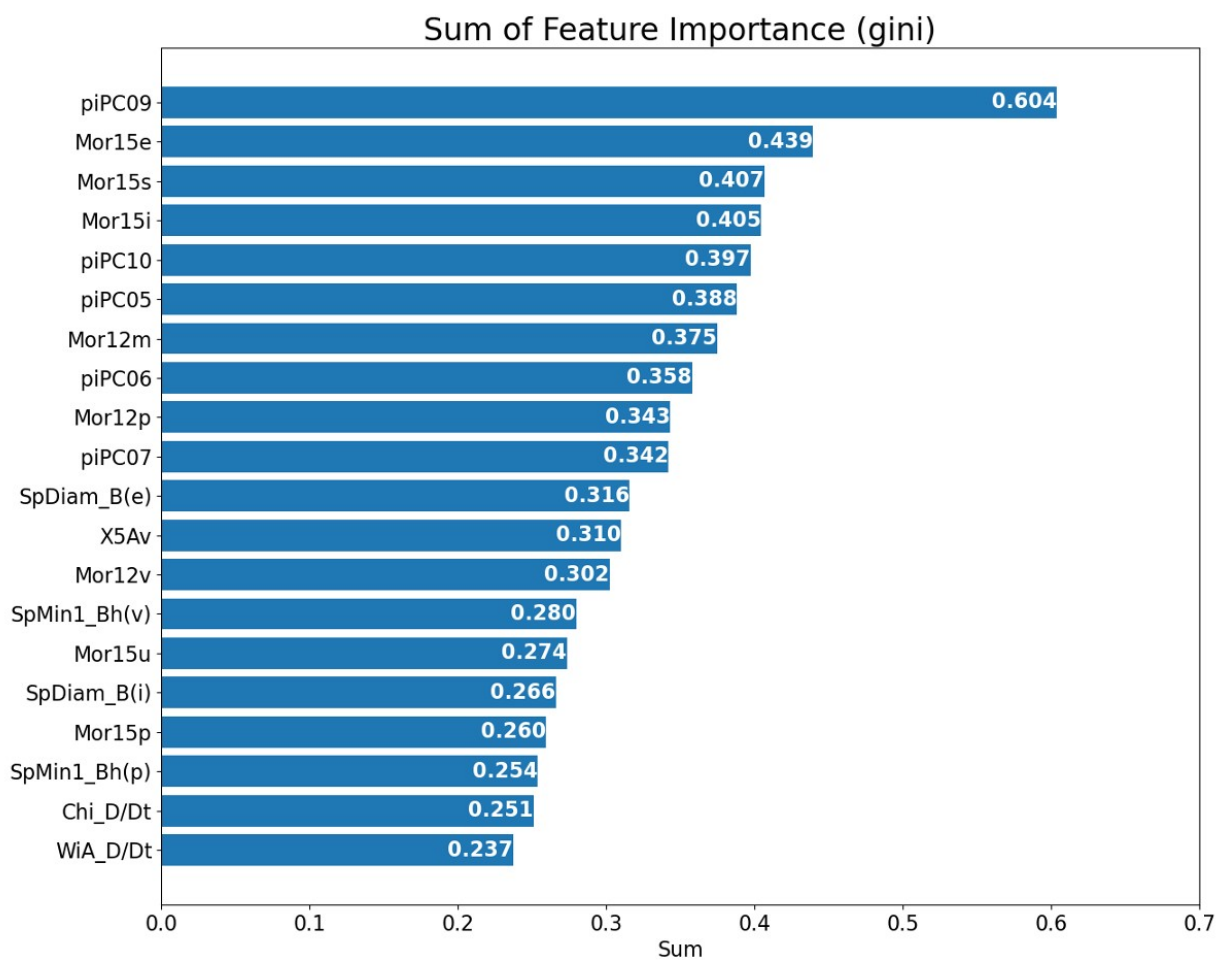

**Fig. S7** The top 20 features ranked by feature importance based on the Gini index in RF algorithm. The Gini index of each feature is the sum of 100 independently experiments with the hits/non-hit ratio 76:74 shown in Fig. 3A.

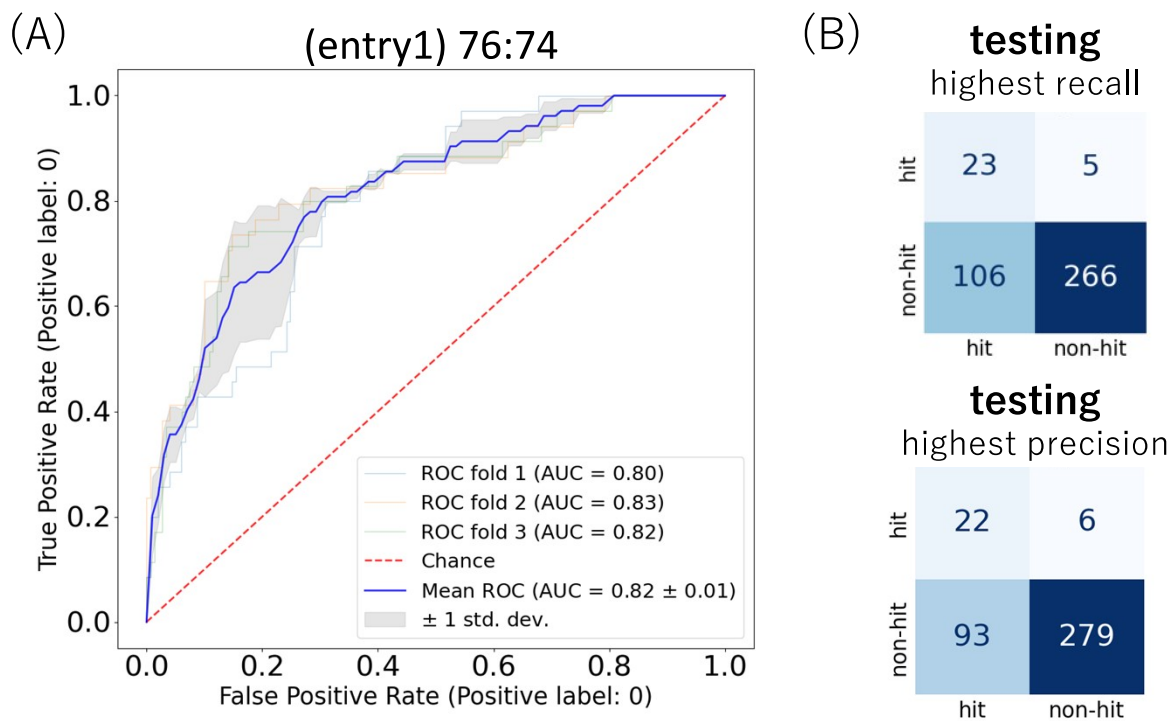

**Fig. S8** The binary classification results where the top 10 descriptors in Fig. 4 were removed, the same as Table S5, entry 1. (A) receiver operating characteristic (ROC) curve with 3-fold cross-validation of the RF model performance. (B) The confusion matrix on the testing dataset. The confusion matrix has the highest recall (upper) and precision (bottom).

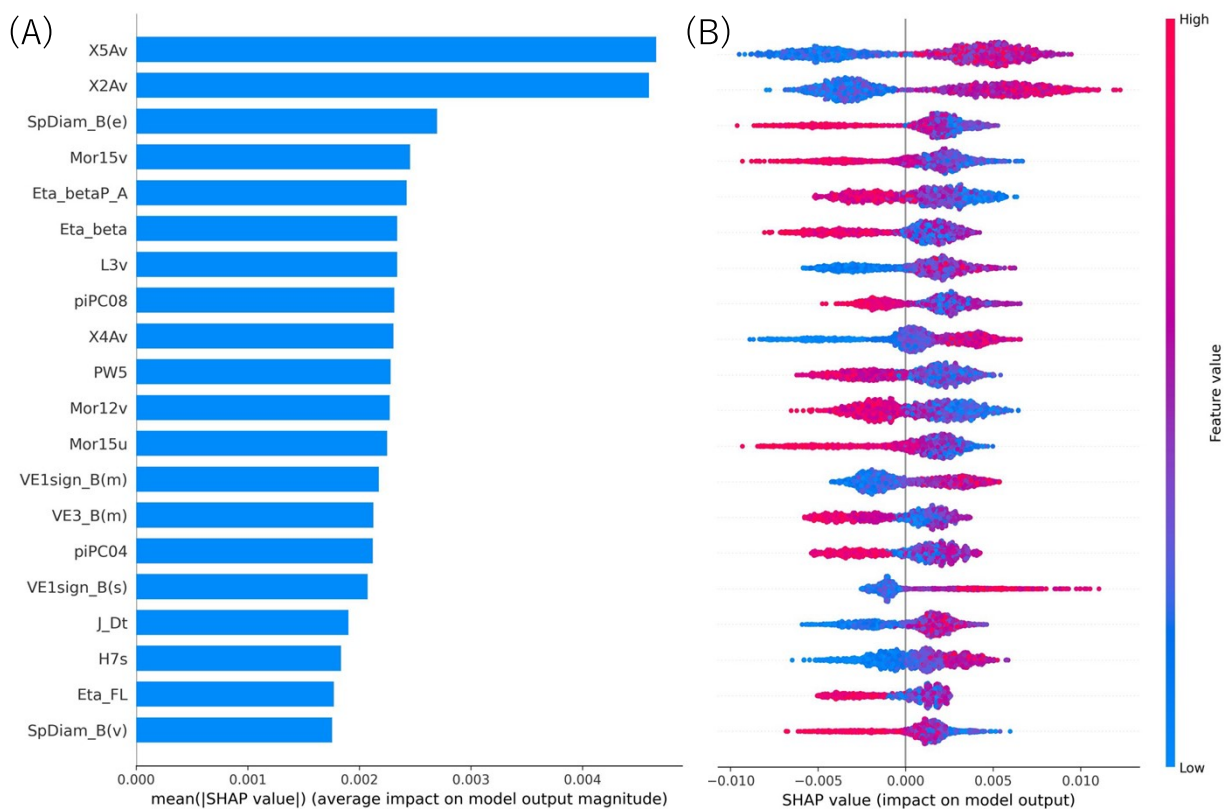

**Fig. S9** The classification is the same as Table S5, entry 1, where the top 10 descriptors in Fig.4 were removed. The new top 20 features rank on (A) global SHAP value and (B) local beeswarm plot. Each instance (here is the molecule) of the dataset appears as its point for each variable. The vertical location is related to the feature's name, as shown in the y-axis. The red and blue colors correspond to each molecule's original descriptor values. Horizontal location indicates a negative or positive prediction with the SHAP value. And the vertical width will increase when data points have a high-density SHAP value.



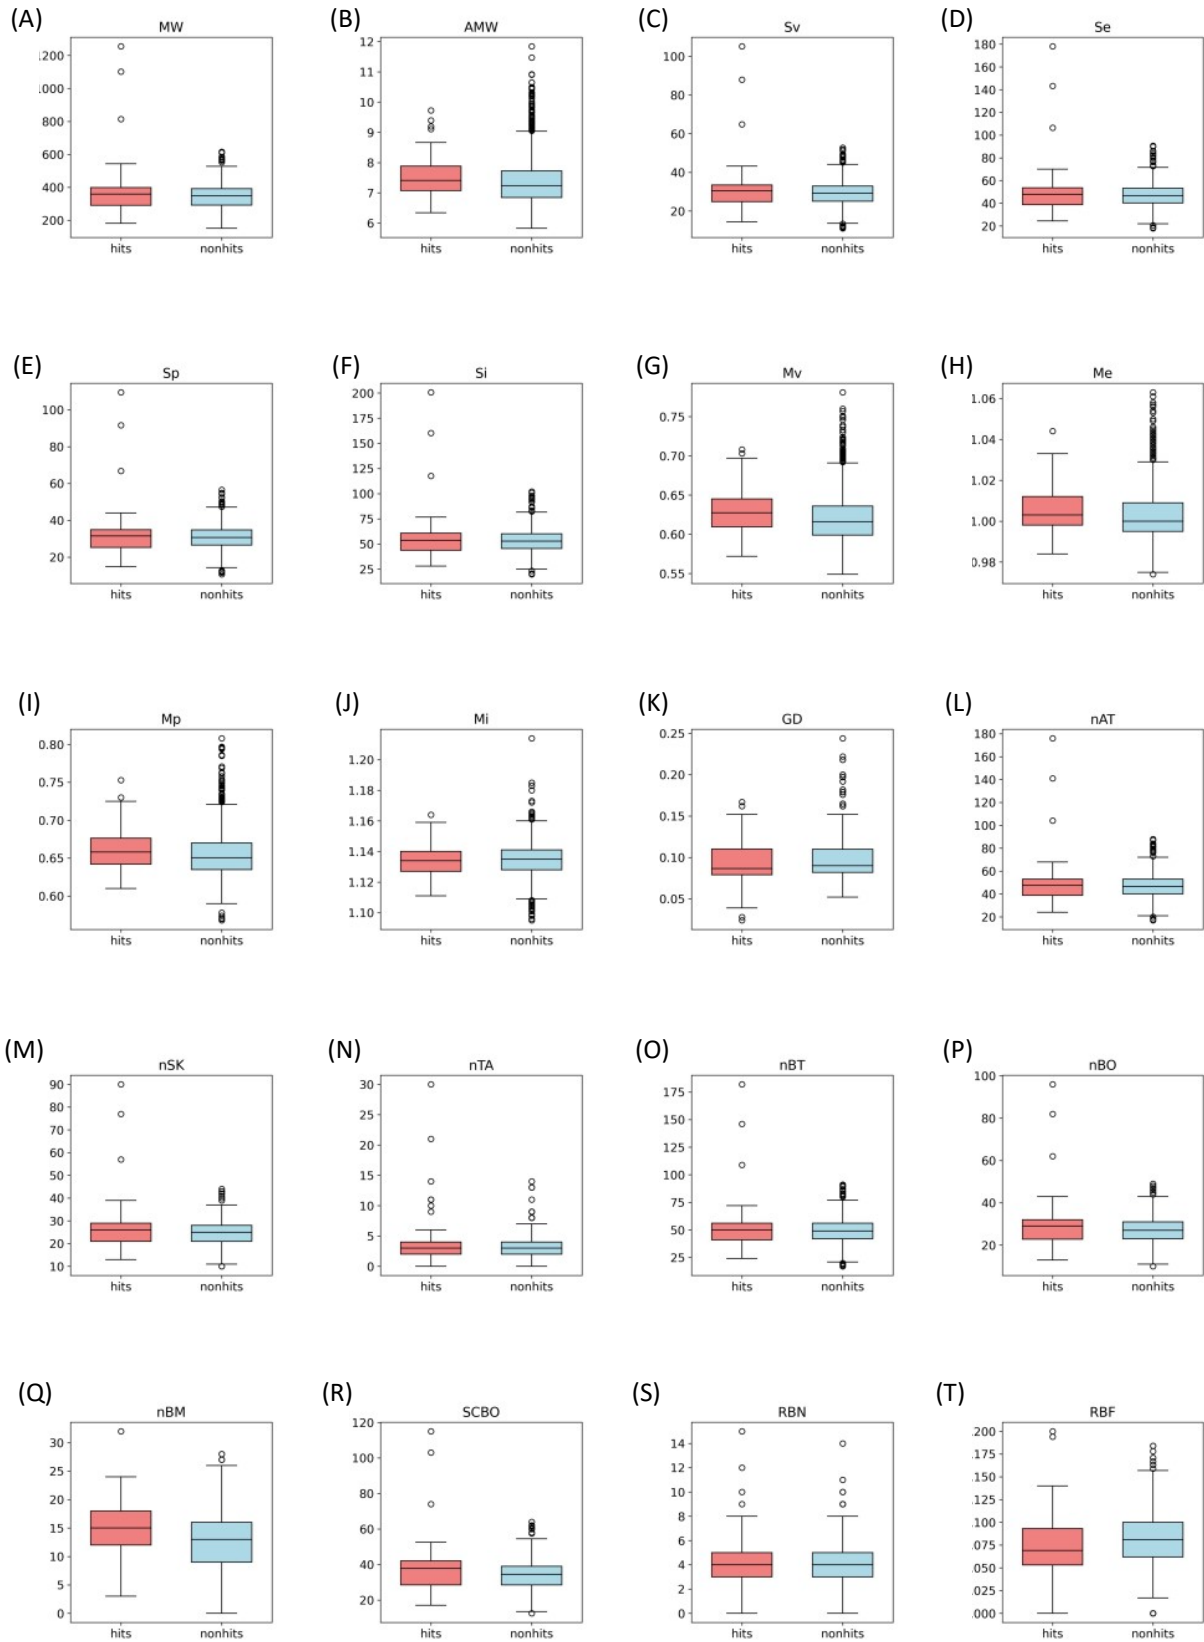

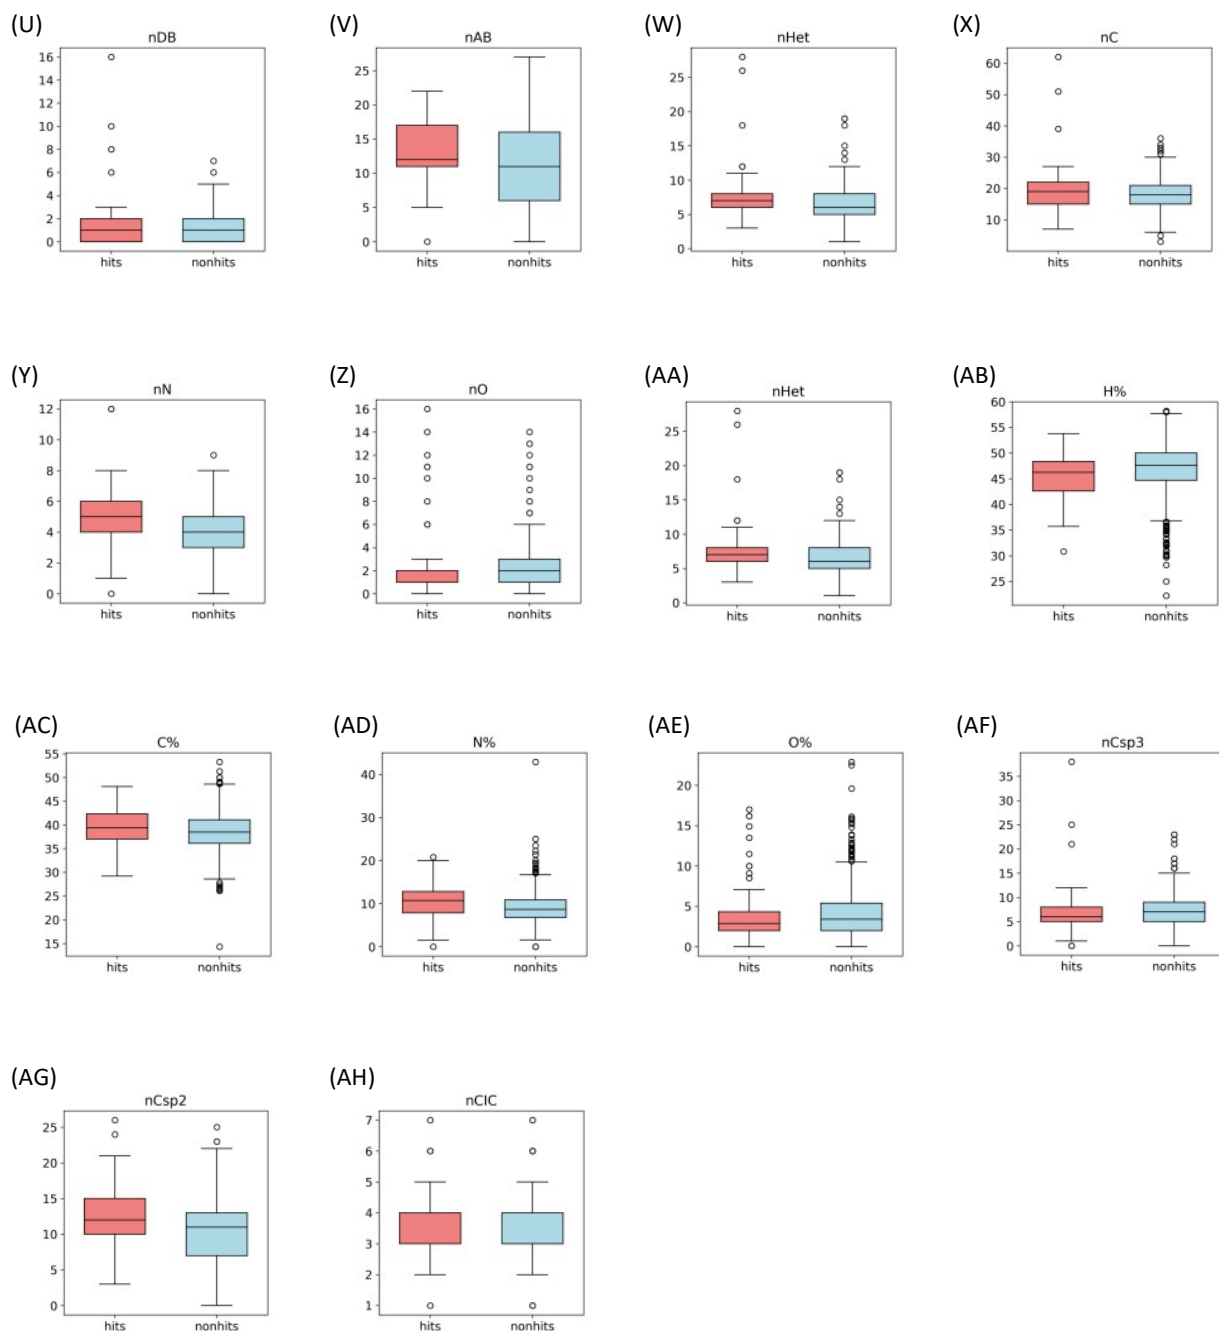

**Fig. S10** Boxplot comparing constitutional descriptors of 104 identified hits (red) and 1896 non-hits (blue). (A) MW: molecular weight; (B) AMW: average molecular weight; (C) Sv: sum of atomic van der Waals volumes (scaled on Carbon atom); (D) Se: sum of atomic Sanderson electronegativities (scaled on Carbon atom); (E) Sp: sum of atomic polarizabilities (scaled on Carbon atom); (F) Si: sum of first ionization potentials (scaled on Carbon atom); (G) Mv: mean atomic van der Waals volume (scaled on Carbon atom); (H) Me: mean atomic Sanderson electronegativity (scaled on Carbon atom); (I) Mp: mean atomic polarizability (scaled on Carbon atom); (J) Mi: mean first ionization potential (scaled on Carbon atom); (K) GD: graph density; (L) nAT: number of atoms; (M) nSK: number of non-H atoms; (N) nTA: number of terminal atoms; (O) nBT: number of bonds; (P) nBO: number of non-H bonds; (Q) nBM: number of multiple bonds; (R) SCBO: sum of conventional bond orders (H-depleted); (S) RBN: number of rotatable

bonds; (T) RBF: rotatable bond fraction; (U) nDB: number of double bonds; (V) nTB: number of triple bonds; (W) nAB: number of aromatic bonds; (X) nC: number of Carbon atoms; (Y) nN: number of Nitrogen atoms; (Z) nO: number of Oxygen atoms; (AA) nHet: number of heteroatoms; (AB) H%: percentage of H atoms; (AC) C%: percentage of C atoms; (AD) N%: percentage of N atoms; (AE) O%: percentage of O atoms; (AF) nCsp3: number of sp3 hybridized Carbon atoms; (AG) nCsp2: number of sp2 hybridized Carbon atoms; (AH) nCIC: number of rings (cyclomatic number)

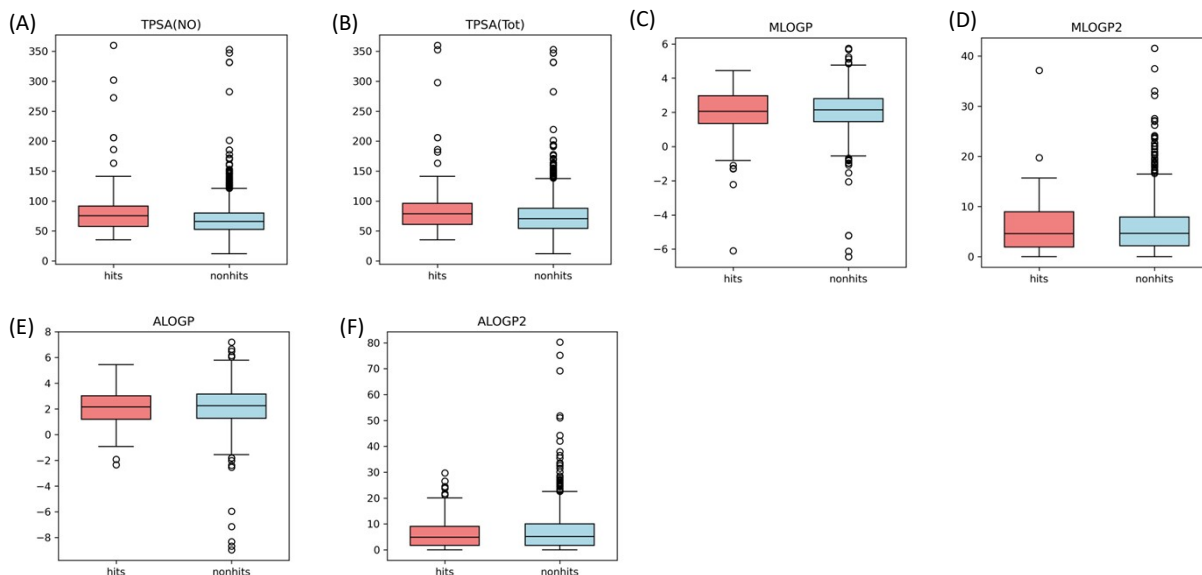

**Fig. S11** Boxplot comparing other physico properties descriptors of 104 identified hits (red) and 1896 non-hits (blue). (A) TPSA (NO): topological polar surface area using N, O polar contributions; (B) TPSA (Tot): topological polar surface area using N, O, S, P polar contributions; (C) MLOGP: Moriguchi octanol-water partition coefficient (logP); (D) MLOGP2: squared Moriguchi octanol-water partition coefficient (logP<sup>2</sup>); (E) ALOGP: Ghose-Crippen octanol-water partition coefficient (logP); (F) ALOGP2: squared Ghose-Crippen octanol-water partition coefficient (logP<sup>2</sup>).

## Supporting Tables

**Table S1** The 30 descriptor categories<sup>2</sup> in this study.

| Entry | category name               | Number of descriptors |
|-------|-----------------------------|-----------------------|
| 1     | Constitutional              | 47                    |
| 2     | Ring descriptors            | 32                    |
| 3     | Topological indices         | 75                    |
| 4     | Walk and path counts        | 46                    |
| 5     | Connectivity indices        | 37                    |
| 6     | Information indices         | 50                    |
| 7     | 2D matrix-based descriptors | 607                   |
| 8     | 2D autocorrelations         | 213                   |
| 9     | Burden eigenvalues          | 96                    |
| 10    | P-VSA-like descriptors      | 55                    |
| 11    | ETA indices                 | 23                    |
| 12    | Edge adjacency indices      | 324                   |
| 13    | Geometrical descriptors     | 38                    |
| 14    | 3D matrix-based descriptors | 99                    |
| 15    | 3D autocorrelations         | 80                    |
| 16    | RDF descriptors             | 210                   |
| 17    | 3D-MoRSE descriptors        | 224                   |
| 18    | WHIM descriptors            | 114                   |
| 19    | GETAWAY descriptors         | 273                   |
| 20    | Randic molecular profiles   | 41                    |
| 21    | Functional groups count     | 154                   |
| 22    | Atom-centred fragments      | 115                   |
| 23    | Atom-type E-state indices   | 172                   |
| 24    | CATS 2D                     | 150                   |
| 25    | 2D Atom Pairs               | 1596                  |
| 26    | 3D Atom Pairs               | 36                    |
| 27    | Charge descriptors          | 15                    |
| 28    | Molecular properties        | 20                    |
| 29    | Drug-like indices           | 28                    |
| 30    | CATS 3D                     | 300                   |

**Table S2** The scores for the binary classification of the original imbalanced data.

|                               | <b>Recall</b> | <b>Precision</b> | <b>F1</b> |
|-------------------------------|---------------|------------------|-----------|
| Classification scores of hits | 0.11          | 0.75             | 0.19      |

**Table S3** The evaluation scores in applying down-sampling. (The scores in this table are for the hit class)

| entry | average recall <sup>a</sup> | highest recall <sup>b</sup> | average precision <sup>a</sup> | highest precision <sup>b</sup> | average F1 <sup>a</sup> | highest F1 <sup>b</sup> | hits:non-hits in training | dropped non-hits <sup>c</sup> |
|-------|-----------------------------|-----------------------------|--------------------------------|--------------------------------|-------------------------|-------------------------|---------------------------|-------------------------------|
| 1     | 0.17                        | 0.32                        | 0.51                           | 0.8                            | 0.26                    | 0.43                    | 76:324                    | 1200                          |
| 2     | 0.31                        | 0.5                         | 0.41                           | 0.75                           | 0.36                    | 0.48                    | 76:224                    | 1300                          |
| 3     | 0.54                        | 0.64                        | 0.28                           | 0.38                           | 0.37                    | 0.45                    | 76:124                    | 1400                          |
| 4     | 0.75                        | 0.86                        | 0.16                           | 0.21                           | 0.26                    | 0.33                    | 76:74                     | 1450                          |
| 5     | 0.89                        | 0.96                        | 0.11                           | 0.13                           | 0.20                    | 0.23                    | 76:49                     | 1475                          |
| 6     | 0.94                        | 1                           | 0.09                           | 0.12                           | 0.18                    | 0.21                    | 76:39                     | 1485                          |

<sup>a</sup>Average scores obtained from 100 recorded prediction scores where the non-hits removed in each replicate experiment differed. The five top and bottom values were excluded from the calculation.

<sup>b</sup>Highest scores obtained from 100 recorded prediction scores where the non-hits removed in each replicate experiment differed.

<sup>c</sup>Non-hits dropped in the whole dataset.

**Table S4** The evaluation scores in applying over-sampling. (The scores in this table are for the hit class)

| entry | average recall <sup>a</sup> | highest recall <sup>b</sup> | average precision <sup>a</sup> | highest precision <sup>b</sup> | average F1 <sup>a</sup> | highest F1 <sup>b</sup> | hits:non-hits in training   | dropped nonhits <sup>d</sup> |
|-------|-----------------------------|-----------------------------|--------------------------------|--------------------------------|-------------------------|-------------------------|-----------------------------|------------------------------|
| 1     | 0.52                        | 0.61                        | 0.42                           | 0.51                           | 0.35                    | 0.46                    | 76 (+248 <sup>c</sup> ):324 | 1200                         |
| 2     | 0.59                        | 0.71                        | 0.29                           | 0.37                           | 0.39                    | 0.48                    | 76 (+148 <sup>c</sup> ):224 | 1300                         |
| 3     | 0.67                        | 0.79                        | 0.21                           | 0.3                            | 0.32                    | 0.42                    | 76 (+48 <sup>c</sup> ):124  | 1400                         |

<sup>a</sup>Average scores obtained from 100 recorded prediction scores where the non-hits removed in each replicate experiment differed. The five top and bottom values were excluded from the calculation.

<sup>b</sup>Highest scores obtained from 100 recorded prediction scores where the non-hits removed in each replicate experiment differed.

<sup>c</sup>Hits oversampled in the training dataset.

<sup>d</sup>Non-hits dropped in the whole dataset.

**Table S5** The prediction scores without the top 10 and 20 descriptors in Fig.4. (The scores in this table are for the hit class)

| entry | removed features | average recall <sup>a</sup> | highest recall <sup>b</sup> | average precision <sup>a</sup> | highest precision <sup>b</sup> | average F1 <sup>a</sup> | highest F1 <sup>b</sup> | hits:non-hits in training | dropped nonhit <sup>c</sup> |
|-------|------------------|-----------------------------|-----------------------------|--------------------------------|--------------------------------|-------------------------|-------------------------|---------------------------|-----------------------------|
| 1     | top 10           | 0.74                        | 0.82                        | 0.15                           | 0.19                           | 0.25                    | 0.31                    | 76:74                     | 1450                        |
| 2     | top 20           | 0.74                        | 0.86                        | 0.15                           | 0.19                           | 0.25                    | 0.32                    | 76:74                     | 1450                        |

<sup>a</sup>Average scores obtained from 100 recorded prediction scores where the non-hits removed in each replicate experiment differed. The five top and bottom values were excluded from the calculation.

<sup>b</sup>Highest scores obtained from 100 recorded prediction scores where the non-hits removed in each replicate experiment differed.

<sup>c</sup>Non-hits dropped in the whole dataset.

## MATERIALS AND METHODS

### 1. Screening of a 2000-compound library using a Biacore T200

SPR measurement were carried out at 25 °C using a Biacore T200. 5' biotinylated DNA oligonucleotides (d(CAG)<sub>40</sub>, d(GAA)<sub>40</sub> and dCont) were immobilized on a streptavidin (SA)-coated SPR sensor chip (Series S Sensor Chip SA, Cytiva) by biotin-SA interaction. A partial sequence of the Htt (huntingtin) intron 1 sequences was selected as the control dCont (AAG TGT TGA CAT TTT TAT TTT ATT TTG TTT TGT TTT GTT TTT TTT GAG ACA GTT CTT GCT CTA TCA GCC AGG CTG GAG TGC ACT AGT GTG ATC TTG GCT CAC TGC AAC CTC TGC CTC TTG). After washing the surface of a SA sensor chip with 50 mM NaOH-1 M NaCl solution, each DNA solution (0.25 μM) in 10 mM HEPES-500 mM NaCl buffer was flowed onto the SA chip at 5 μL/min at 25 °C. The immobilized amount of DNA oligonucleotides was summarized in the table below. A 2000-compound library, which contains 201 compounds predicted to bind to CAG repeat DNAs, 1472 compounds predicted to bind to DNAs/RNAs, and 327 compounds with diverse structures, was screened against the DNA-immobilized sensor chip. The library compounds were diluted to 50 μM in the running buffer (1×HBS-EP+ buffer containing 5% (v/v) DMSO) and flowed onto the DNA-immobilized sensor surface (A contact time of 15 s with a 15-s dissociation time). Naphthyridine-Azaquinolone (**NA**) was used as a positive control, and a non-binder (Np1-N012) from our in-house chemical library was used as a negative control. Solvent correction was performed with 8-point samples at from 2–4% DMSO. Regeneration of the sensor surface was achieved by flowing the regeneration solution (1.2 mM NaOH, 0.2 M NaCl, and 0.1 mM EDTA) for 600 sec every 40 compounds. Injections of the DMSO containing solutions for solvent correction, the control samples, and the regeneration solution were included every 40 cycles in this order.

The sensorgrams obtained were analyzed using the BIAevaluation software. The row sensorgrams were solvent-corrected and referenced by subtracting the signals obtained from the reference cell (Fc1). The binding response values were calculated 4 seconds before the end of each injection and averaged over a 4-sec window. The binding response was normalized to those of control samples and molecular weight. From the screening process, compounds that showed a relative binding response unit (RU) value of >20 against d(CAG)<sub>40</sub> were selected, resulting in 104 hits.

| Immobilized DNA and its amount on a SPR sensor surface |                                 |                            |
|--------------------------------------------------------|---------------------------------|----------------------------|
| Flow cell                                              | DNA                             | Immobilized amount (in RU) |
| Fc1                                                    | none (reference cell)           | 20.2                       |
| Fc2                                                    | Biotin-TEG-d(CAG) <sub>40</sub> | 840.8                      |
| Fc3                                                    | Biotin-TEG-d(GAA) <sub>40</sub> | 872.9                      |
| Fc4                                                    | Biotin-TEG-dCont                | 833.6                      |

### 2. Machine learning

Molecular descriptors for the 2000 compounds were generated by transforming the chemical structures to numerical values using Dragon 7.0 software, providing 5270 descriptors classified into 30 categories (Table S1) including atom types, functional groups, geometrical descriptions, and properties. The machine learning predictive analysis was conducted utilizing the PyCharm professional (version 2021.3.2) Integrated Development Environment (IDE). PyCharm was set up with the relevant Python interpreter. A new project was then initiated within this environment. Essential libraries (shown in the requirements below) were integrated by employing PyCharm's package manager with the compatible version. Subsequently, the algorithmic code was developed, beginning with the importation and preprocessing of the dataset via pandas and numpy. The scikit-learn library facilitated the implementation of a random forest and XGBoost classifiers. The dataset of 2000 compounds were partitioned into training and testing

subsets (8:2 ratio), then, with the model being trained on the former and its performance was evaluated against the latter. Model parameters (such as the tree number: `n_estimators`, and size of each tree: `max_depth` were fine-tuned to enhance predictive accuracy, but the grid search process is not involved in the provided code.)

### **2000 small molecule dataset**

`dataset/Dragon_2000cpds.csv`

### **Scripts**

`RFcls_main_latest.py` (Classification and evaluation.)

`categorical_index.py` (A required module for over-sampling)

Dataset and code are available in GitHub:

[https://github.com/chen26sanken/RF\\_Generation-of-a-focused-molecule-library-by-machine-learning-targeting-CAG-repeat-DNA.git](https://github.com/chen26sanken/RF_Generation-of-a-focused-molecule-library-by-machine-learning-targeting-CAG-repeat-DNA.git).

### **Requirements for creating the virtual environment:**

`matplotlib~=3.5.1`

`scikit-learn~=1.1.1`

`numpy~=1.21.6`

`pandas~=1.4.3`

`seaborn~=0.11.2`

`shap~=0.41.0`

`ipython~=8.5.0`

`xgboost~=1.6.2`

`tqdm~=4.64.1`

`~=: compatible version`

## References

1. K. Nakatani, S. Hagihara, Y. Goto, A. Kobori, M. Hagihara, G. Hayashi, M. Kyo, M. Nomura, M. Mishima and C. Kojima, *Nat. Chem. Biol.*, 2005, **1**, 39–43.
2. I. Tetko, J. Gasteiger, R. Todeschini, A. Mauri, D. Livingstone, P. Ertl, V. Palyulin, E. Radchenko, N. Zefirov, A. Makarenko, V. Tanchuk and V. Prokopenko, *J. Comput. Aid. Mol. Des.*, 2005, **19**, 453–463.



## Appendix A

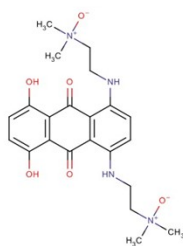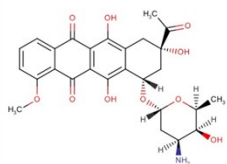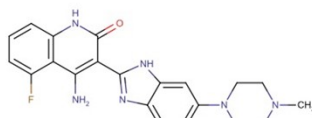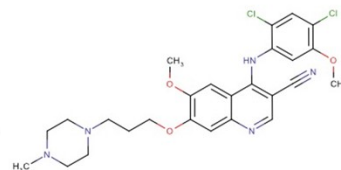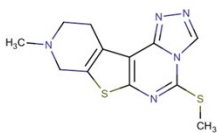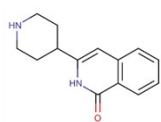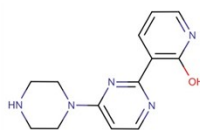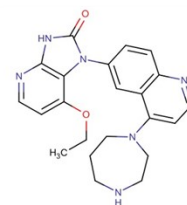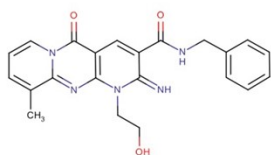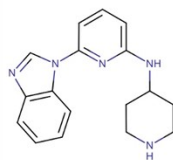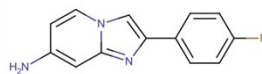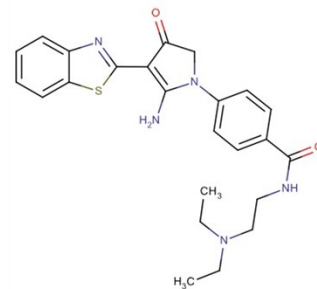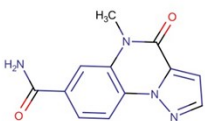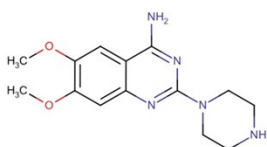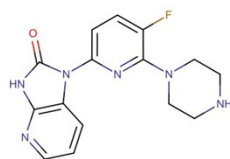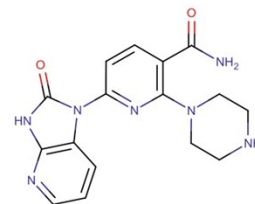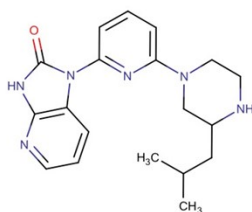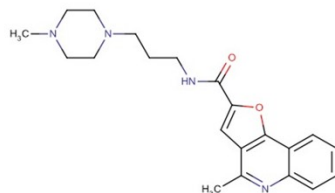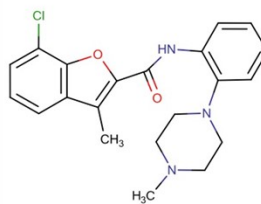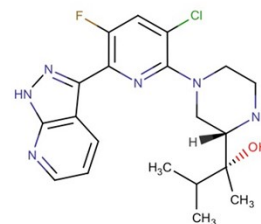

## Appendix B

The categorical features, which used SMOTE-NC function to oversample in this study.

|               |           |             |             |           |
|---------------|-----------|-------------|-------------|-----------|
| nAT           | nSK       | nTA         | nBT         | nBO       |
| nBM           | RBN       | nDB         | nTB         | nAB       |
| nH            | nC        | nN          | nO          | nP        |
| nS            | nF        | nCL         | nBR         | nI        |
| nB            | nHM       | nHet        | nX          | nCsp3     |
| nCsp2         | nCsp      | nStructures | totalcharge | nCIC      |
| nCIR          | TRS       | Rperim      | Rbrid       | NRS       |
| nR03          | nR04      | nR05        | nR06        | nR07      |
| nR08          | nR09      | nR10        | nR11        | nR12      |
| nBnz          | ZM1       | ZM1V        | ZM2         | ZM2V      |
| Qindex        | BBI       | Ram         | Pol         | ECC       |
| UNIP          | CENT      | VAR         | SMTI        | SMTIV     |
| GMTI          | GMTIV     | CSI         | Wap         | Psi_e_t   |
| BAC           | Ges       | Wi_D        | SpPos_L     | SpMax_X   |
| Wi_Dt         | P_VSA_v_4 | Mor01u      | H0u         | HATSu     |
| nCp           | nCs       | nCt         | nCq         | nCrs      |
| nCrt          | nCrq      | nCar        | nCbH        | nCb-      |
| nCconj        | nR=Cp     | nR=Cs       | nR=Ct       | n=C=      |
| nR#CH/X       | nR#C-     | nROCN       | nArOCN      | nRNCO     |
| nArNCO        | nRSCN     | nArSCN      | nRNCS       | nArNCS    |
| nRCOOH        | nArCOOH   | nRCOOR      | nArCOOR     | nRCONH2   |
| nArCONH2      | nRCONHR   | nArCONHR    | nRCONR2     | nArCONR2  |
| nROCON        | nArOCON   | nRCOX       | nArCOX      | nRCSOH    |
| nArCSOH       | nRCSSH    | nArCSSH     | nRCOSR      | nArCOSR   |
| nRCSSR        | nArCSSR   | nRCHO       | nArCHO      | nRCO      |
| nArCO         | nCONN     | nC=O(O)2    | nN=C-N<     | nC(=N)N2  |
| nRC=N         | nArC=N    | nRCNO       | nArCNO      | nRNH2     |
| nArNH2        | nRNHR     | nArNHR      | nRNR2       | nArNR2    |
| nN-N          | nN=N      | nRCN        | nArCN       | nN+       |
| nNq           | nRNHO     | nArNHO      | nRNNOx      | nArNNOx   |
| nRNO          | nArNO     | nRNO2       | nArNO2      | nN(CO)2   |
| nC=N-N<       | nROH      | nArOH       | nOHp        | nOHs      |
| nOHt          | nROR      | nArOR       | nROX        | nArOX     |
| nO(C=O)2      | nH2O      | nSH         | nC=S        | nRSR      |
| nRSSR         | nSO       | nS(=O)2     | nSOH        | nSOOH     |
| nSO2OH        | nSO3OH    | nSO2        | nSO3        | nSO4      |
| nSO2N         | nPO3      | nPO4        | nPR3        | nP(=O)O2R |
| nP(=O)R3/nPR5 | nCH2RX    | nCHR2X      | nCR3X       | nR=CHX    |
| nR=CRX        | nR#CX     | nCHRX2      | nCR2X2      | nR=CX2    |
| nCRX3         | nArX      | nCXr        | nCXr=       | nCconjX   |
| nAziridines   | nOxiranes | nThiranes   | nAzetidines | nOxetanes |

|                |               |               |               |                |
|----------------|---------------|---------------|---------------|----------------|
| nThioethanes   | nBeta-Lactams | nPyrrolidines | nOxolanes     | ntH-Thiophenes |
| nPyrroles      | nPyrazoles    | nImidazoles   | nFuranes      | nThiophenes    |
| nOxazoles      | nIsoxazoles   | nThiazoles    | nIsothiazoles | nTriazoles     |
| nPyridines     | nPyridazines  | nPyrimidines  | nPyrazines    | n135-Triazines |
| n124-Triazines | nHDon         | nHAcc         | nHBonds       | C-001          |
| C-002          | C-003         | C-004         | C-005         | C-006          |
| C-007          | C-008         | C-009         | C-010         | C-011          |
| C-012          | C-013         | C-014         | C-015         | C-016          |
| C-017          | C-018         | C-019         | C-020         | C-021          |
| C-022          | C-023         | C-024         | C-025         | C-026          |
| C-027          | C-028         | C-029         | C-030         | C-031          |
| C-032          | C-033         | C-034         | C-035         | C-036          |
| C-037          | C-038         | C-039         | C-040         | C-041          |
| C-042          | C-043         | C-044         | H-046         | H-047          |
| H-048          | H-049         | H-050         | H-051         | H-052          |
| H-053          | H-054         | H-055         | O-056         | O-057          |
| O-058          | O-059         | O-060         | O-061         | O-062          |
| O-063          | Se-064        | Se-065        | N-066         | N-067          |
| N-068          | N-069         | N-070         | N-071         | N-072          |
| N-073          | N-074         | N-075         | N-076         | N-077          |
| N-078          | N-079         | F-081         | F-082         | F-083          |
| F-084          | F-085         | Cl-086        | Cl-087        | Cl-088         |
| Cl-089         | Cl-090        | Br-091        | Br-092        | Br-093         |
| Br-094         | Br-095        | I-096         | I-097         | I-098          |
| I-099          | I-100         | F-101         | Cl-102        | Br-103         |
| I-104          | S-106         | S-107         | S-108         | S-109          |
| S-110          | Si-111        | B-112         | P-115         | P-116          |
| P-117          | P-118         | P-119         | P-120         | SddC           |
| SsNH3+         | SsssNH2+      | SdNH2+        | SsssNH+       | SsPH2          |
| SssPH          | SsssP         | SddsP         | SsssssP       | SsSH           |
| SssssssS       | SsI           | SsLi          | SssBe         | SssssBe-       |
| SsBH2          | SssBH         | SsssB         | SssssB-       | SsGeH3         |
| SssGeH2        | SsssGeH       | SssssGe       | SsAsH2        | SssAsH         |
| SsssAs         | SsssssAs      | SdsssAs       | SddsAs        | SsSeH          |
| SdSe           | SssSe         | SaaSe         | SdssSe        | SssssssSe      |
| SddssSe        | SsSnH3        | SssSnH2       | SsssSnH       | SssssSn        |
| SsPbH3         | SssPbH2       | SsssPbH       | SssssPb       | SsSiH3         |
| SssSiH2        | SsssSiH       | SssssSi       | NsCH3         | NdCH2          |
| NssCH2         | NtCH          | NdsCH         | NaaCH         | NsssCH         |
| NddC           | NtsC          | NdssC         | NaasC         | NaaaC          |
| NssssC         | NsNH2         | NssNH         | NdNH          | NsssN          |
| NdsN           | NaaN          | NtN           | NsNH3+        | NssNH2+        |
| NdNH2+         | NsssNH+       | NssssN+       | NddsN         | NaadN          |
| NaasN          | NaaNH         | NsOH          | NdO           | NssO           |

|              |              |              |              |              |
|--------------|--------------|--------------|--------------|--------------|
| NaaO         | NsPH2        | NssPH        | NsssP        | NdsssP       |
| NddsP        | NsssssP      | NsSH         | NdS          | NssS         |
| NaaS         | NdssS        | NddssS       | NsssssS      | NsF          |
| NsCl         | NsBr         | Nsl          | NsLi         | NssBe        |
| NssssBe-     | NsBH2        | NssBH        | NsssB        | NssssB-      |
| NsGeH3       | NssGeH2      | NsssGeH      | NssssGe      | NsAsH2       |
| NssAsH       | NssAs        | NsssssAs     | NdsssAs      | NddsAs       |
| NsSeH        | NdSe         | NssSe        | NaaSe        | NdssSe       |
| NssssssSe    | NddssSe      | NsSnH3       | NssSnH2      | NsssSnH      |
| NssssSn      | NsPbH3       | NssPbH2      | NsssPbH      | NssssPb      |
| NsSiH3       | NssSiH2      | NsssSiH      | NssssSi      | CATS2D_00_DD |
| CATS2D_01_DD | CATS2D_02_DD | CATS2D_03_DD | CATS2D_04_DD | CATS2D_05_DD |
| CATS2D_06_DD | CATS2D_07_DD | CATS2D_08_DD | CATS2D_09_DD | CATS2D_00_DA |
| CATS2D_01_DA | CATS2D_02_DA | CATS2D_03_DA | CATS2D_04_DA | CATS2D_05_DA |
| CATS2D_06_DA | CATS2D_07_DA | CATS2D_08_DA | CATS2D_09_DA | CATS2D_00_DP |
| CATS2D_01_DP | CATS2D_02_DP | CATS2D_03_DP | CATS2D_04_DP | CATS2D_05_DP |
| CATS2D_06_DP | CATS2D_07_DP | CATS2D_08_DP | CATS2D_09_DP | CATS2D_00_DN |
| CATS2D_01_DN | CATS2D_02_DN | CATS2D_03_DN | CATS2D_04_DN | CATS2D_05_DN |
| CATS2D_06_DN | CATS2D_07_DN | CATS2D_08_DN | CATS2D_09_DN | CATS2D_00_DL |
| CATS2D_01_DL | CATS2D_02_DL | CATS2D_03_DL | CATS2D_04_DL | CATS2D_05_DL |
| CATS2D_06_DL | CATS2D_07_DL | CATS2D_08_DL | CATS2D_09_DL | CATS2D_00_AA |
| CATS2D_01_AA | CATS2D_02_AA | CATS2D_03_AA | CATS2D_04_AA | CATS2D_05_AA |
| CATS2D_06_AA | CATS2D_07_AA | CATS2D_08_AA | CATS2D_09_AA | CATS2D_00_AP |
| CATS2D_01_AP | CATS2D_02_AP | CATS2D_03_AP | CATS2D_04_AP | CATS2D_05_AP |
| CATS2D_06_AP | CATS2D_07_AP | CATS2D_08_AP | CATS2D_09_AP | CATS2D_00_AN |
| CATS2D_01_AN | CATS2D_02_AN | CATS2D_03_AN | CATS2D_04_AN | CATS2D_05_AN |
| CATS2D_06_AN | CATS2D_07_AN | CATS2D_08_AN | CATS2D_09_AN | CATS2D_00_AL |
| CATS2D_01_AL | CATS2D_02_AL | CATS2D_03_AL | CATS2D_04_AL | CATS2D_05_AL |
| CATS2D_06_AL | CATS2D_07_AL | CATS2D_08_AL | CATS2D_09_AL | CATS2D_00_PP |
| CATS2D_01_PP | CATS2D_02_PP | CATS2D_03_PP | CATS2D_04_PP | CATS2D_05_PP |
| CATS2D_06_PP | CATS2D_07_PP | CATS2D_08_PP | CATS2D_09_PP | CATS2D_00_PN |
| CATS2D_01_PN | CATS2D_02_PN | CATS2D_03_PN | CATS2D_04_PN | CATS2D_05_PN |
| CATS2D_06_PN | CATS2D_07_PN | CATS2D_08_PN | CATS2D_09_PN | CATS2D_00_PL |
| CATS2D_01_PL | CATS2D_02_PL | CATS2D_03_PL | CATS2D_04_PL | CATS2D_05_PL |
| CATS2D_06_PL | CATS2D_07_PL | CATS2D_08_PL | CATS2D_09_PL | CATS2D_00_NN |
| CATS2D_01_NN | CATS2D_02_NN | CATS2D_03_NN | CATS2D_04_NN | CATS2D_05_NN |
| CATS2D_06_NN | CATS2D_07_NN | CATS2D_08_NN | CATS2D_09_NN | CATS2D_00_NL |
| CATS2D_01_NL | CATS2D_02_NL | CATS2D_03_NL | CATS2D_04_NL | CATS2D_05_NL |
| CATS2D_06_NL | CATS2D_07_NL | CATS2D_08_NL | CATS2D_09_NL | CATS2D_00_LL |
| CATS2D_01_LL | CATS2D_02_LL | CATS2D_03_LL | CATS2D_04_LL | CATS2D_05_LL |
| CATS2D_06_LL | CATS2D_07_LL | CATS2D_08_LL | CATS2D_09_LL | T(N..N)      |
| T(N..O)      | T(N..S)      | T(N..P)      | T(N..F)      | T(N..Cl)     |
| T(N..Br)     | T(N..I)      | T(O..O)      | T(O..S)      | T(O..P)      |
| T(O..F)      | T(O..Cl)     | T(O..Br)     | T(O..I)      | T(S..S)      |

|            |            |            |            |            |
|------------|------------|------------|------------|------------|
| T(S..P)    | T(S..F)    | T(S..Cl)   | T(S..Br)   | T(S..I)    |
| T(P..P)    | T(P..F)    | T(P..Cl)   | T(P..Br)   | T(P..I)    |
| T(F..F)    | T(F..Cl)   | T(F..Br)   | T(F..I)    | T(Cl..Cl)  |
| T(Cl..Br)  | T(Cl..I)   | T(Br..Br)  | T(Br..I)   | T(I..I)    |
| B01[C-C]   | B01[C-N]   | B01[C-O]   | B01[C-S]   | B01[C-P]   |
| B01[C-F]   | B01[C-Cl]  | B01[C-Br]  | B01[C-I]   | B01[C-B]   |
| B01[C-Si]  | B01[C-X]   | B01[N-N]   | B01[N-O]   | B01[N-S]   |
| B01[N-P]   | B01[N-F]   | B01[N-Cl]  | B01[N-Br]  | B01[N-I]   |
| B01[N-B]   | B01[N-Si]  | B01[N-X]   | B01[O-O]   | B01[O-S]   |
| B01[O-P]   | B01[O-F]   | B01[O-Cl]  | B01[O-Br]  | B01[O-I]   |
| B01[O-B]   | B01[O-Si]  | B01[O-X]   | B01[S-S]   | B01[S-P]   |
| B01[S-F]   | B01[S-Cl]  | B01[S-Br]  | B01[S-I]   | B01[S-B]   |
| B01[S-Si]  | B01[S-X]   | B01[P-P]   | B01[P-F]   | B01[P-Cl]  |
| B01[P-Br]  | B01[P-I]   | B01[P-B]   | B01[P-Si]  | B01[P-X]   |
| B01[F-F]   | B01[F-Cl]  | B01[F-Br]  | B01[F-I]   | B01[F-B]   |
| B01[F-Si]  | B01[F-X]   | B01[Cl-Cl] | B01[Cl-Br] | B01[Cl-I]  |
| B01[Cl-B]  | B01[Cl-Si] | B01[Cl-X]  | B01[Br-Br] | B01[Br-I]  |
| B01[Br-B]  | B01[Br-Si] | B01[Br-X]  | B01[I-I]   | B01[I-B]   |
| B01[I-Si]  | B01[I-X]   | B01[B-B]   | B01[B-Si]  | B01[B-X]   |
| B01[Si-Si] | B01[Si-X]  | B01[X-X]   | B02[C-C]   | B02[C-N]   |
| B02[C-O]   | B02[C-S]   | B02[C-P]   | B02[C-F]   | B02[C-Cl]  |
| B02[C-Br]  | B02[C-I]   | B02[C-B]   | B02[C-Si]  | B02[C-X]   |
| B02[N-N]   | B02[N-O]   | B02[N-S]   | B02[N-P]   | B02[N-F]   |
| B02[N-Cl]  | B02[N-Br]  | B02[N-I]   | B02[N-B]   | B02[N-Si]  |
| B02[N-X]   | B02[O-O]   | B02[O-S]   | B02[O-P]   | B02[O-F]   |
| B02[O-Cl]  | B02[O-Br]  | B02[O-I]   | B02[O-B]   | B02[O-Si]  |
| B02[O-X]   | B02[S-S]   | B02[S-P]   | B02[S-F]   | B02[S-Cl]  |
| B02[S-Br]  | B02[S-I]   | B02[S-B]   | B02[S-Si]  | B02[S-X]   |
| B02[P-P]   | B02[P-F]   | B02[P-Cl]  | B02[P-Br]  | B02[P-I]   |
| B02[P-B]   | B02[P-Si]  | B02[P-X]   | B02[F-F]   | B02[F-Cl]  |
| B02[F-Br]  | B02[F-I]   | B02[F-B]   | B02[F-Si]  | B02[F-X]   |
| B02[Cl-Cl] | B02[Cl-Br] | B02[Cl-I]  | B02[Cl-B]  | B02[Cl-Si] |
| B02[Cl-X]  | B02[Br-Br] | B02[Br-I]  | B02[Br-B]  | B02[Br-Si] |
| B02[Br-X]  | B02[I-I]   | B02[I-B]   | B02[I-Si]  | B02[I-X]   |
| B02[B-B]   | B02[B-Si]  | B02[B-X]   | B02[Si-Si] | B02[Si-X]  |
| B02[X-X]   | B03[C-C]   | B03[C-N]   | B03[C-O]   | B03[C-S]   |
| B03[C-P]   | B03[C-F]   | B03[C-Cl]  | B03[C-Br]  | B03[C-I]   |
| B03[C-B]   | B03[C-Si]  | B03[C-X]   | B03[N-N]   | B03[N-O]   |
| B03[N-S]   | B03[N-P]   | B03[N-F]   | B03[N-Cl]  | B03[N-Br]  |
| B03[N-I]   | B03[N-B]   | B03[N-Si]  | B03[N-X]   | B03[O-O]   |
| B03[O-S]   | B03[O-P]   | B03[O-F]   | B03[O-Cl]  | B03[O-Br]  |
| B03[O-I]   | B03[O-B]   | B03[O-Si]  | B03[O-X]   | B03[S-S]   |
| B03[S-P]   | B03[S-F]   | B03[S-Cl]  | B03[S-Br]  | B03[S-I]   |
| B03[S-B]   | B03[S-Si]  | B03[S-X]   | B03[P-P]   | B03[P-F]   |

|            |            |            |            |            |
|------------|------------|------------|------------|------------|
| B03[P-Cl]  | B03[P-Br]  | B03[P-I]   | B03[P-B]   | B03[P-Si]  |
| B03[P-X]   | B03[F-F]   | B03[F-Cl]  | B03[F-Br]  | B03[F-I]   |
| B03[F-B]   | B03[F-Si]  | B03[F-X]   | B03[Cl-Cl] | B03[Cl-Br] |
| B03[Cl-I]  | B03[Cl-B]  | B03[Cl-Si] | B03[Cl-X]  | B03[Br-Br] |
| B03[Br-I]  | B03[Br-B]  | B03[Br-Si] | B03[Br-X]  | B03[I-I]   |
| B03[I-B]   | B03[I-Si]  | B03[I-X]   | B03[B-B]   | B03[B-Si]  |
| B03[B-X]   | B03[Si-Si] | B03[Si-X]  | B03[X-X]   | B04[C-C]   |
| B04[C-N]   | B04[C-O]   | B04[C-S]   | B04[C-P]   | B04[C-F]   |
| B04[C-Cl]  | B04[C-Br]  | B04[C-I]   | B04[C-B]   | B04[C-Si]  |
| B04[C-X]   | B04[N-N]   | B04[N-O]   | B04[N-S]   | B04[N-P]   |
| B04[N-F]   | B04[N-Cl]  | B04[N-Br]  | B04[N-I]   | B04[N-B]   |
| B04[N-Si]  | B04[N-X]   | B04[O-O]   | B04[O-S]   | B04[O-P]   |
| B04[O-F]   | B04[O-Cl]  | B04[O-Br]  | B04[O-I]   | B04[O-B]   |
| B04[O-Si]  | B04[O-X]   | B04[S-S]   | B04[S-P]   | B04[S-F]   |
| B04[S-Cl]  | B04[S-Br]  | B04[S-I]   | B04[S-B]   | B04[S-Si]  |
| B04[S-X]   | B04[P-P]   | B04[P-F]   | B04[P-Cl]  | B04[P-Br]  |
| B04[P-I]   | B04[P-B]   | B04[P-Si]  | B04[P-X]   | B04[F-F]   |
| B04[F-Cl]  | B04[F-Br]  | B04[F-I]   | B04[F-B]   | B04[F-Si]  |
| B04[F-X]   | B04[Cl-Cl] | B04[Cl-Br] | B04[Cl-I]  | B04[Cl-B]  |
| B04[Cl-Si] | B04[Cl-X]  | B04[Br-Br] | B04[Br-I]  | B04[Br-B]  |
| B04[Br-Si] | B04[Br-X]  | B04[I-I]   | B04[I-B]   | B04[I-Si]  |
| B04[I-X]   | B04[B-B]   | B04[B-Si]  | B04[B-X]   | B04[Si-Si] |
| B04[Si-X]  | B04[X-X]   | B05[C-C]   | B05[C-N]   | B05[C-O]   |
| B05[C-S]   | B05[C-P]   | B05[C-F]   | B05[C-Cl]  | B05[C-Br]  |
| B05[C-I]   | B05[C-B]   | B05[C-Si]  | B05[C-X]   | B05[N-N]   |
| B05[N-O]   | B05[N-S]   | B05[N-P]   | B05[N-F]   | B05[N-Cl]  |
| B05[N-Br]  | B05[N-I]   | B05[N-B]   | B05[N-Si]  | B05[N-X]   |
| B05[O-O]   | B05[O-S]   | B05[O-P]   | B05[O-F]   | B05[O-Cl]  |
| B05[O-Br]  | B05[O-I]   | B05[O-B]   | B05[O-Si]  | B05[O-X]   |
| B05[S-S]   | B05[S-P]   | B05[S-F]   | B05[S-Cl]  | B05[S-Br]  |
| B05[S-I]   | B05[S-B]   | B05[S-Si]  | B05[S-X]   | B05[P-P]   |
| B05[P-F]   | B05[P-Cl]  | B05[P-Br]  | B05[P-I]   | B05[P-B]   |
| B05[P-Si]  | B05[P-X]   | B05[F-F]   | B05[F-Cl]  | B05[F-Br]  |
| B05[F-I]   | B05[F-B]   | B05[F-Si]  | B05[F-X]   | B05[Cl-Cl] |
| B05[Cl-Br] | B05[Cl-I]  | B05[Cl-B]  | B05[Cl-Si] | B05[Cl-X]  |
| B05[Br-Br] | B05[Br-I]  | B05[Br-B]  | B05[Br-Si] | B05[Br-X]  |
| B05[I-I]   | B05[I-B]   | B05[I-Si]  | B05[I-X]   | B05[B-B]   |
| B05[B-Si]  | B05[B-X]   | B05[Si-Si] | B05[Si-X]  | B05[X-X]   |
| B06[C-C]   | B06[C-N]   | B06[C-O]   | B06[C-S]   | B06[C-P]   |
| B06[C-F]   | B06[C-Cl]  | B06[C-Br]  | B06[C-I]   | B06[C-B]   |
| B06[C-Si]  | B06[C-X]   | B06[N-N]   | B06[N-O]   | B06[N-S]   |
| B06[N-P]   | B06[N-F]   | B06[N-Cl]  | B06[N-Br]  | B06[N-I]   |
| B06[N-B]   | B06[N-Si]  | B06[N-X]   | B06[O-O]   | B06[O-S]   |
| B06[O-P]   | B06[O-F]   | B06[O-Cl]  | B06[O-Br]  | B06[O-I]   |

|            |            |            |            |            |
|------------|------------|------------|------------|------------|
| B06[O-B]   | B06[O-Si]  | B06[O-X]   | B06[S-S]   | B06[S-P]   |
| B06[S-F]   | B06[S-Cl]  | B06[S-Br]  | B06[S-I]   | B06[S-B]   |
| B06[S-Si]  | B06[S-X]   | B06[P-P]   | B06[P-F]   | B06[P-Cl]  |
| B06[P-Br]  | B06[P-I]   | B06[P-B]   | B06[P-Si]  | B06[P-X]   |
| B06[F-F]   | B06[F-Cl]  | B06[F-Br]  | B06[F-I]   | B06[F-B]   |
| B06[F-Si]  | B06[F-X]   | B06[Cl-Cl] | B06[Cl-Br] | B06[Cl-I]  |
| B06[Cl-B]  | B06[Cl-Si] | B06[Cl-X]  | B06[Br-Br] | B06[Br-I]  |
| B06[Br-B]  | B06[Br-Si] | B06[Br-X]  | B06[I-I]   | B06[I-B]   |
| B06[I-Si]  | B06[I-X]   | B06[B-B]   | B06[B-Si]  | B06[B-X]   |
| B06[Si-Si] | B06[Si-X]  | B06[X-X]   | B07[C-C]   | B07[C-N]   |
| B07[C-O]   | B07[C-S]   | B07[C-P]   | B07[C-F]   | B07[C-Cl]  |
| B07[C-Br]  | B07[C-I]   | B07[C-B]   | B07[C-Si]  | B07[C-X]   |
| B07[N-N]   | B07[N-O]   | B07[N-S]   | B07[N-P]   | B07[N-F]   |
| B07[N-Cl]  | B07[N-Br]  | B07[N-I]   | B07[N-B]   | B07[N-Si]  |
| B07[N-X]   | B07[O-O]   | B07[O-S]   | B07[O-P]   | B07[O-F]   |
| B07[O-Cl]  | B07[O-Br]  | B07[O-I]   | B07[O-B]   | B07[O-Si]  |
| B07[O-X]   | B07[S-S]   | B07[S-P]   | B07[S-F]   | B07[S-Cl]  |
| B07[S-Br]  | B07[S-I]   | B07[S-B]   | B07[S-Si]  | B07[S-X]   |
| B07[P-P]   | B07[P-F]   | B07[P-Cl]  | B07[P-Br]  | B07[P-I]   |
| B07[P-B]   | B07[P-Si]  | B07[P-X]   | B07[F-F]   | B07[F-Cl]  |
| B07[F-Br]  | B07[F-I]   | B07[F-B]   | B07[F-Si]  | B07[F-X]   |
| B07[Cl-Cl] | B07[Cl-Br] | B07[Cl-I]  | B07[Cl-B]  | B07[Cl-Si] |
| B07[Cl-X]  | B07[Br-Br] | B07[Br-I]  | B07[Br-B]  | B07[Br-Si] |
| B07[Br-X]  | B07[I-I]   | B07[I-B]   | B07[I-Si]  | B07[I-X]   |
| B07[B-B]   | B07[B-Si]  | B07[B-X]   | B07[Si-Si] | B07[Si-X]  |
| B07[X-X]   | B08[C-C]   | B08[C-N]   | B08[C-O]   | B08[C-S]   |
| B08[C-P]   | B08[C-F]   | B08[C-Cl]  | B08[C-Br]  | B08[C-I]   |
| B08[C-B]   | B08[C-Si]  | B08[C-X]   | B08[N-N]   | B08[N-O]   |
| B08[N-S]   | B08[N-P]   | B08[N-F]   | B08[N-Cl]  | B08[N-Br]  |
| B08[N-I]   | B08[N-B]   | B08[N-Si]  | B08[N-X]   | B08[O-O]   |
| B08[O-S]   | B08[O-P]   | B08[O-F]   | B08[O-Cl]  | B08[O-Br]  |
| B08[O-I]   | B08[O-B]   | B08[O-Si]  | B08[O-X]   | B08[S-S]   |
| B08[S-P]   | B08[S-F]   | B08[S-Cl]  | B08[S-Br]  | B08[S-I]   |
| B08[S-B]   | B08[S-Si]  | B08[S-X]   | B08[P-P]   | B08[P-F]   |
| B08[P-Cl]  | B08[P-Br]  | B08[P-I]   | B08[P-B]   | B08[P-Si]  |
| B08[P-X]   | B08[F-F]   | B08[F-Cl]  | B08[F-Br]  | B08[F-I]   |
| B08[F-B]   | B08[F-Si]  | B08[F-X]   | B08[Cl-Cl] | B08[Cl-Br] |
| B08[Cl-I]  | B08[Cl-B]  | B08[Cl-Si] | B08[Cl-X]  | B08[Br-Br] |
| B08[Br-I]  | B08[Br-B]  | B08[Br-Si] | B08[Br-X]  | B08[I-I]   |
| B08[I-B]   | B08[I-Si]  | B08[I-X]   | B08[B-B]   | B08[B-Si]  |
| B08[B-X]   | B08[Si-Si] | B08[Si-X]  | B08[X-X]   | B09[C-C]   |
| B09[C-N]   | B09[C-O]   | B09[C-S]   | B09[C-P]   | B09[C-F]   |
| B09[C-Cl]  | B09[C-Br]  | B09[C-I]   | B09[C-B]   | B09[C-Si]  |
| B09[C-X]   | B09[N-N]   | B09[N-O]   | B09[N-S]   | B09[N-P]   |

|            |            |            |            |            |
|------------|------------|------------|------------|------------|
| B09[N-F]   | B09[N-Cl]  | B09[N-Br]  | B09[N-I]   | B09[N-B]   |
| B09[N-Si]  | B09[N-X]   | B09[O-O]   | B09[O-S]   | B09[O-P]   |
| B09[O-F]   | B09[O-Cl]  | B09[O-Br]  | B09[O-I]   | B09[O-B]   |
| B09[O-Si]  | B09[O-X]   | B09[S-S]   | B09[S-P]   | B09[S-F]   |
| B09[S-Cl]  | B09[S-Br]  | B09[S-I]   | B09[S-B]   | B09[S-Si]  |
| B09[S-X]   | B09[P-P]   | B09[P-F]   | B09[P-Cl]  | B09[P-Br]  |
| B09[P-I]   | B09[P-B]   | B09[P-Si]  | B09[P-X]   | B09[F-F]   |
| B09[F-Cl]  | B09[F-Br]  | B09[F-I]   | B09[F-B]   | B09[F-Si]  |
| B09[F-X]   | B09[Cl-Cl] | B09[Cl-Br] | B09[Cl-I]  | B09[Cl-B]  |
| B09[Cl-Si] | B09[Cl-X]  | B09[Br-Br] | B09[Br-I]  | B09[Br-B]  |
| B09[Br-Si] | B09[Br-X]  | B09[I-I]   | B09[I-B]   | B09[I-Si]  |
| B09[I-X]   | B09[B-B]   | B09[B-Si]  | B09[B-X]   | B09[Si-Si] |
| B09[Si-X]  | B09[X-X]   | B10[C-C]   | B10[C-N]   | B10[C-O]   |
| B10[C-S]   | B10[C-P]   | B10[C-F]   | B10[C-Cl]  | B10[C-Br]  |
| B10[C-I]   | B10[C-B]   | B10[C-Si]  | B10[C-X]   | B10[N-N]   |
| B10[N-O]   | B10[N-S]   | B10[N-P]   | B10[N-F]   | B10[N-Cl]  |
| B10[N-Br]  | B10[N-I]   | B10[N-B]   | B10[N-Si]  | B10[N-X]   |
| B10[O-O]   | B10[O-S]   | B10[O-P]   | B10[O-F]   | B10[O-Cl]  |
| B10[O-Br]  | B10[O-I]   | B10[O-B]   | B10[O-Si]  | B10[O-X]   |
| B10[S-S]   | B10[S-P]   | B10[S-F]   | B10[S-Cl]  | B10[S-Br]  |
| B10[S-I]   | B10[S-B]   | B10[S-Si]  | B10[S-X]   | B10[P-P]   |
| B10[P-F]   | B10[P-Cl]  | B10[P-Br]  | B10[P-I]   | B10[P-B]   |
| B10[P-Si]  | B10[P-X]   | B10[F-F]   | B10[F-Cl]  | B10[F-Br]  |
| B10[F-I]   | B10[F-B]   | B10[F-Si]  | B10[F-X]   | B10[Cl-Cl] |
| B10[Cl-Br] | B10[Cl-I]  | B10[Cl-B]  | B10[Cl-Si] | B10[Cl-X]  |
| B10[Br-Br] | B10[Br-I]  | B10[Br-B]  | B10[Br-Si] | B10[Br-X]  |
| B10[I-I]   | B10[I-B]   | B10[I-Si]  | B10[I-X]   | B10[B-B]   |
| B10[B-Si]  | B10[B-X]   | B10[Si-Si] | B10[Si-X]  | B10[X-X]   |
| F01[C-C]   | F01[C-N]   | F01[C-O]   | F01[C-S]   | F01[C-P]   |
| F01[C-F]   | F01[C-Cl]  | F01[C-Br]  | F01[C-I]   | F01[C-B]   |
| F01[C-Si]  | F01[C-X]   | F01[N-N]   | F01[N-O]   | F01[N-S]   |
| F01[N-P]   | F01[N-F]   | F01[N-Cl]  | F01[N-Br]  | F01[N-I]   |
| F01[N-B]   | F01[N-Si]  | F01[N-X]   | F01[O-O]   | F01[O-S]   |
| F01[O-P]   | F01[O-F]   | F01[O-Cl]  | F01[O-Br]  | F01[O-I]   |
| F01[O-B]   | F01[O-Si]  | F01[O-X]   | F01[S-S]   | F01[S-P]   |
| F01[S-F]   | F01[S-Cl]  | F01[S-Br]  | F01[S-I]   | F01[S-B]   |
| F01[S-Si]  | F01[S-X]   | F01[P-P]   | F01[P-F]   | F01[P-Cl]  |
| F01[P-Br]  | F01[P-I]   | F01[P-B]   | F01[P-Si]  | F01[P-X]   |
| F01[F-F]   | F01[F-Cl]  | F01[F-Br]  | F01[F-I]   | F01[F-B]   |
| F01[F-Si]  | F01[F-X]   | F01[Cl-Cl] | F01[Cl-Br] | F01[Cl-I]  |
| F01[Cl-B]  | F01[Cl-Si] | F01[Cl-X]  | F01[Br-Br] | F01[Br-I]  |
| F01[Br-B]  | F01[Br-Si] | F01[Br-X]  | F01[I-I]   | F01[I-B]   |
| F01[I-Si]  | F01[I-X]   | F01[B-B]   | F01[B-Si]  | F01[B-X]   |
| F01[Si-Si] | F01[Si-X]  | F01[X-X]   | F02[C-C]   | F02[C-N]   |



|            |            |            |            |            |
|------------|------------|------------|------------|------------|
| F02[C-O]   | F02[C-S]   | F02[C-P]   | F02[C-F]   | F02[C-Cl]  |
| F02[C-Br]  | F02[C-I]   | F02[C-B]   | F02[C-Si]  | F02[C-X]   |
| F02[N-N]   | F02[N-O]   | F02[N-S]   | F02[N-P]   | F02[N-F]   |
| F02[N-Cl]  | F02[N-Br]  | F02[N-I]   | F02[N-B]   | F02[N-Si]  |
| F02[N-X]   | F02[O-O]   | F02[O-S]   | F02[O-P]   | F02[O-F]   |
| F02[O-Cl]  | F02[O-Br]  | F02[O-I]   | F02[O-B]   | F02[O-Si]  |
| F02[O-X]   | F02[S-S]   | F02[S-P]   | F02[S-F]   | F02[S-Cl]  |
| F02[S-Br]  | F02[S-I]   | F02[S-B]   | F02[S-Si]  | F02[S-X]   |
| F02[P-P]   | F02[P-F]   | F02[P-Cl]  | F02[P-Br]  | F02[P-I]   |
| F02[P-B]   | F02[P-Si]  | F02[P-X]   | F02[F-F]   | F02[F-Cl]  |
| F02[F-Br]  | F02[F-I]   | F02[F-B]   | F02[F-Si]  | F02[F-X]   |
| F02[Cl-Cl] | F02[Cl-Br] | F02[Cl-I]  | F02[Cl-B]  | F02[Cl-Si] |
| F02[Cl-X]  | F02[Br-Br] | F02[Br-I]  | F02[Br-B]  | F02[Br-Si] |
| F02[Br-X]  | F02[I-I]   | F02[I-B]   | F02[I-Si]  | F02[I-X]   |
| F02[B-B]   | F02[B-Si]  | F02[B-X]   | F02[Si-Si] | F02[Si-X]  |
| F02[X-X]   | F03[C-C]   | F03[C-N]   | F03[C-O]   | F03[C-S]   |
| F03[C-P]   | F03[C-F]   | F03[C-Cl]  | F03[C-Br]  | F03[C-I]   |
| F03[C-B]   | F03[C-Si]  | F03[C-X]   | F03[N-N]   | F03[N-O]   |
| F03[N-S]   | F03[N-P]   | F03[N-F]   | F03[N-Cl]  | F03[N-Br]  |
| F03[N-I]   | F03[N-B]   | F03[N-Si]  | F03[N-X]   | F03[O-O]   |
| F03[O-S]   | F03[O-P]   | F03[O-F]   | F03[O-Cl]  | F03[O-Br]  |
| F03[O-I]   | F03[O-B]   | F03[O-Si]  | F03[O-X]   | F03[S-S]   |
| F03[S-P]   | F03[S-F]   | F03[S-Cl]  | F03[S-Br]  | F03[S-I]   |
| F03[S-B]   | F03[S-Si]  | F03[S-X]   | F03[P-P]   | F03[P-F]   |
| F03[P-Cl]  | F03[P-Br]  | F03[P-I]   | F03[P-B]   | F03[P-Si]  |
| F03[P-X]   | F03[F-F]   | F03[F-Cl]  | F03[F-Br]  | F03[F-I]   |
| F03[F-B]   | F03[F-Si]  | F03[F-X]   | F03[Cl-Cl] | F03[Cl-Br] |
| F03[Cl-I]  | F03[Cl-B]  | F03[Cl-Si] | F03[Cl-X]  | F03[Br-Br] |
| F03[Br-I]  | F03[Br-B]  | F03[Br-Si] | F03[Br-X]  | F03[I-I]   |
| F03[I-B]   | F03[I-Si]  | F03[I-X]   | F03[B-B]   | F03[B-Si]  |
| F03[B-X]   | F03[Si-Si] | F03[Si-X]  | F03[X-X]   | F04[C-C]   |
| F04[C-N]   | F04[C-O]   | F04[C-S]   | F04[C-P]   | F04[C-F]   |
| F04[C-Cl]  | F04[C-Br]  | F04[C-I]   | F04[C-B]   | F04[C-Si]  |
| F04[C-X]   | F04[N-N]   | F04[N-O]   | F04[N-S]   | F04[N-P]   |
| F04[N-F]   | F04[N-Cl]  | F04[N-Br]  | F04[N-I]   | F04[N-B]   |
| F04[N-Si]  | F04[N-X]   | F04[O-O]   | F04[O-S]   | F04[O-P]   |
| F04[O-F]   | F04[O-Cl]  | F04[O-Br]  | F04[O-I]   | F04[O-B]   |
| F04[O-Si]  | F04[O-X]   | F04[S-S]   | F04[S-P]   | F04[S-F]   |
| F04[S-Cl]  | F04[S-Br]  | F04[S-I]   | F04[S-B]   | F04[S-Si]  |
| F04[S-X]   | F04[P-P]   | F04[P-F]   | F04[P-Cl]  | F04[P-Br]  |
| F04[P-I]   | F04[P-B]   | F04[P-Si]  | F04[P-X]   | F04[F-F]   |
| F04[F-Cl]  | F04[F-Br]  | F04[F-I]   | F04[F-B]   | F04[F-Si]  |
| F04[F-X]   | F04[Cl-Cl] | F04[Cl-Br] | F04[Cl-I]  | F04[Cl-B]  |
| F04[Cl-Si] | F04[Cl-X]  | F04[Br-Br] | F04[Br-I]  | F04[Br-B]  |

|            |            |            |            |            |
|------------|------------|------------|------------|------------|
| F04[Br-Si] | F04[Br-X]  | F04[I-I]   | F04[I-B]   | F04[I-Si]  |
| F04[I-X]   | F04[B-B]   | F04[B-Si]  | F04[B-X]   | F04[Si-Si] |
| F04[Si-X]  | F04[X-X]   | F05[C-C]   | F05[C-N]   | F05[C-O]   |
| F05[C-S]   | F05[C-P]   | F05[C-F]   | F05[C-Cl]  | F05[C-Br]  |
| F05[C-I]   | F05[C-B]   | F05[C-Si]  | F05[C-X]   | F05[N-N]   |
| F05[N-O]   | F05[N-S]   | F05[N-P]   | F05[N-F]   | F05[N-Cl]  |
| F05[N-Br]  | F05[N-I]   | F05[N-B]   | F05[N-Si]  | F05[N-X]   |
| F05[O-O]   | F05[O-S]   | F05[O-P]   | F05[O-F]   | F05[O-Cl]  |
| F05[O-Br]  | F05[O-I]   | F05[O-B]   | F05[O-Si]  | F05[O-X]   |
| F05[S-S]   | F05[S-P]   | F05[S-F]   | F05[S-Cl]  | F05[S-Br]  |
| F05[S-I]   | F05[S-B]   | F05[S-Si]  | F05[S-X]   | F05[P-P]   |
| F05[P-F]   | F05[P-Cl]  | F05[P-Br]  | F05[P-I]   | F05[P-B]   |
| F05[P-Si]  | F05[P-X]   | F05[F-F]   | F05[F-Cl]  | F05[F-Br]  |
| F05[F-I]   | F05[F-B]   | F05[F-Si]  | F05[F-X]   | F05[Cl-Cl] |
| F05[Cl-Br] | F05[Cl-I]  | F05[Cl-B]  | F05[Cl-Si] | F05[Cl-X]  |
| F05[Br-Br] | F05[Br-I]  | F05[Br-B]  | F05[Br-Si] | F05[Br-X]  |
| F05[I-I]   | F05[I-B]   | F05[I-Si]  | F05[I-X]   | F05[B-B]   |
| F05[B-Si]  | F05[B-X]   | F05[Si-Si] | F05[Si-X]  | F05[X-X]   |
| F06[C-C]   | F06[C-N]   | F06[C-O]   | F06[C-S]   | F06[C-P]   |
| F06[C-F]   | F06[C-Cl]  | F06[C-Br]  | F06[C-I]   | F06[C-B]   |
| F06[C-Si]  | F06[C-X]   | F06[N-N]   | F06[N-O]   | F06[N-S]   |
| F06[N-P]   | F06[N-F]   | F06[N-Cl]  | F06[N-Br]  | F06[N-I]   |
| F06[N-B]   | F06[N-Si]  | F06[N-X]   | F06[O-O]   | F06[O-S]   |
| F06[O-P]   | F06[O-F]   | F06[O-Cl]  | F06[O-Br]  | F06[O-I]   |
| F06[O-B]   | F06[O-Si]  | F06[O-X]   | F06[S-S]   | F06[S-P]   |
| F06[S-F]   | F06[S-Cl]  | F06[S-Br]  | F06[S-I]   | F06[S-B]   |
| F06[S-Si]  | F06[S-X]   | F06[P-P]   | F06[P-F]   | F06[P-Cl]  |
| F06[P-Br]  | F06[P-I]   | F06[P-B]   | F06[P-Si]  | F06[P-X]   |
| F06[F-F]   | F06[F-Cl]  | F06[F-Br]  | F06[F-I]   | F06[F-B]   |
| F06[F-Si]  | F06[F-X]   | F06[Cl-Cl] | F06[Cl-Br] | F06[Cl-I]  |
| F06[Cl-B]  | F06[Cl-Si] | F06[Cl-X]  | F06[Br-Br] | F06[Br-I]  |
| F06[Br-B]  | F06[Br-Si] | F06[Br-X]  | F06[I-I]   | F06[I-B]   |
| F06[I-Si]  | F06[I-X]   | F06[B-B]   | F06[B-Si]  | F06[B-X]   |
| F06[Si-Si] | F06[Si-X]  | F06[X-X]   | F07[C-C]   | F07[C-N]   |
| F07[C-O]   | F07[C-S]   | F07[C-P]   | F07[C-F]   | F07[C-Cl]  |
| F07[C-Br]  | F07[C-I]   | F07[C-B]   | F07[C-Si]  | F07[C-X]   |
| F07[N-N]   | F07[N-O]   | F07[N-S]   | F07[N-P]   | F07[N-F]   |
| F07[N-Cl]  | F07[N-Br]  | F07[N-I]   | F07[N-B]   | F07[N-Si]  |
| F07[N-X]   | F07[O-O]   | F07[O-S]   | F07[O-P]   | F07[O-F]   |
| F07[O-Cl]  | F07[O-Br]  | F07[O-I]   | F07[O-B]   | F07[O-Si]  |
| F07[O-X]   | F07[S-S]   | F07[S-P]   | F07[S-F]   | F07[S-Cl]  |
| F07[S-Br]  | F07[S-I]   | F07[S-B]   | F07[S-Si]  | F07[S-X]   |
| F07[P-P]   | F07[P-F]   | F07[P-Cl]  | F07[P-Br]  | F07[P-I]   |
| F07[P-B]   | F07[P-Si]  | F07[P-X]   | F07[F-F]   | F07[F-Cl]  |

|            |            |            |            |            |
|------------|------------|------------|------------|------------|
| F07[F-Br]  | F07[F-I]   | F07[F-B]   | F07[F-Si]  | F07[F-X]   |
| F07[Cl-Cl] | F07[Cl-Br] | F07[Cl-I]  | F07[Cl-B]  | F07[Cl-Si] |
| F07[Cl-X]  | F07[Br-Br] | F07[Br-I]  | F07[Br-B]  | F07[Br-Si] |
| F07[Br-X]  | F07[I-I]   | F07[I-B]   | F07[I-Si]  | F07[I-X]   |
| F07[B-B]   | F07[B-Si]  | F07[B-X]   | F07[Si-Si] | F07[Si-X]  |
| F07[X-X]   | F08[C-C]   | F08[C-N]   | F08[C-O]   | F08[C-S]   |
| F08[C-P]   | F08[C-F]   | F08[C-Cl]  | F08[C-Br]  | F08[C-I]   |
| F08[C-B]   | F08[C-Si]  | F08[C-X]   | F08[N-N]   | F08[N-O]   |
| F08[N-S]   | F08[N-P]   | F08[N-F]   | F08[N-Cl]  | F08[N-Br]  |
| F08[N-I]   | F08[N-B]   | F08[N-Si]  | F08[N-X]   | F08[O-O]   |
| F08[O-S]   | F08[O-P]   | F08[O-F]   | F08[O-Cl]  | F08[O-Br]  |
| F08[O-I]   | F08[O-B]   | F08[O-Si]  | F08[O-X]   | F08[S-S]   |
| F08[S-P]   | F08[S-F]   | F08[S-Cl]  | F08[S-Br]  | F08[S-I]   |
| F08[S-B]   | F08[S-Si]  | F08[S-X]   | F08[P-P]   | F08[P-F]   |
| F08[P-Cl]  | F08[P-Br]  | F08[P-I]   | F08[P-B]   | F08[P-Si]  |
| F08[P-X]   | F08[F-F]   | F08[F-Cl]  | F08[F-Br]  | F08[F-I]   |
| F08[F-B]   | F08[F-Si]  | F08[F-X]   | F08[Cl-Cl] | F08[Cl-Br] |
| F08[Cl-I]  | F08[Cl-B]  | F08[Cl-Si] | F08[Cl-X]  | F08[Br-Br] |
| F08[Br-I]  | F08[Br-B]  | F08[Br-Si] | F08[Br-X]  | F08[I-I]   |
| F08[I-B]   | F08[I-Si]  | F08[I-X]   | F08[B-B]   | F08[B-Si]  |
| F08[B-X]   | F08[Si-Si] | F08[Si-X]  | F08[X-X]   | F09[C-C]   |
| F09[C-N]   | F09[C-O]   | F09[C-S]   | F09[C-P]   | F09[C-F]   |
| F09[C-Cl]  | F09[C-Br]  | F09[C-I]   | F09[C-B]   | F09[C-Si]  |
| F09[C-X]   | F09[N-N]   | F09[N-O]   | F09[N-S]   | F09[N-P]   |
| F09[N-F]   | F09[N-Cl]  | F09[N-Br]  | F09[N-I]   | F09[N-B]   |
| F09[N-Si]  | F09[N-X]   | F09[O-O]   | F09[O-S]   | F09[O-P]   |
| F09[O-F]   | F09[O-Cl]  | F09[O-Br]  | F09[O-I]   | F09[O-B]   |
| F09[O-Si]  | F09[O-X]   | F09[S-S]   | F09[S-P]   | F09[S-F]   |
| F09[S-Cl]  | F09[S-Br]  | F09[S-I]   | F09[S-B]   | F09[S-Si]  |
| F09[S-X]   | F09[P-P]   | F09[P-F]   | F09[P-Cl]  | F09[P-Br]  |
| F09[P-I]   | F09[P-B]   | F09[P-Si]  | F09[P-X]   | F09[F-F]   |
| F09[F-Cl]  | F09[F-Br]  | F09[F-I]   | F09[F-B]   | F09[F-Si]  |
| F09[F-X]   | F09[Cl-Cl] | F09[Cl-Br] | F09[Cl-I]  | F09[Cl-B]  |
| F09[Cl-Si] | F09[Cl-X]  | F09[Br-Br] | F09[Br-I]  | F09[Br-B]  |
| F09[Br-Si] | F09[Br-X]  | F09[I-I]   | F09[I-B]   | F09[I-Si]  |
| F09[I-X]   | F09[B-B]   | F09[B-Si]  | F09[B-X]   | F09[Si-Si] |
| F09[Si-X]  | F09[X-X]   | F10[C-C]   | F10[C-N]   | F10[C-O]   |
| F10[C-S]   | F10[C-P]   | F10[C-F]   | F10[C-Cl]  | F10[C-Br]  |
| F10[C-I]   | F10[C-B]   | F10[C-Si]  | F10[C-X]   | F10[N-N]   |
| F10[N-O]   | F10[N-S]   | F10[N-P]   | F10[N-F]   | F10[N-Cl]  |
| F10[N-Br]  | F10[N-I]   | F10[N-B]   | F10[N-Si]  | F10[N-X]   |
| F10[O-O]   | F10[O-S]   | F10[O-P]   | F10[O-F]   | F10[O-Cl]  |
| F10[O-Br]  | F10[O-I]   | F10[O-B]   | F10[O-Si]  | F10[O-X]   |
| F10[S-S]   | F10[S-P]   | F10[S-F]   | F10[S-Cl]  | F10[S-Br]  |

|              |              |              |              |              |
|--------------|--------------|--------------|--------------|--------------|
| F10[S-I]     | F10[S-B]     | F10[S-Si]    | F10[S-X]     | F10[P-P]     |
| F10[P-F]     | F10[P-Cl]    | F10[P-Br]    | F10[P-I]     | F10[P-B]     |
| F10[P-Si]    | F10[P-X]     | F10[F-F]     | F10[F-Cl]    | F10[F-Br]    |
| F10[F-I]     | F10[F-B]     | F10[F-Si]    | F10[F-X]     | F10[Cl-Cl]   |
| F10[Cl-Br]   | F10[Cl-I]    | F10[Cl-B]    | F10[Cl-Si]   | F10[Cl-X]    |
| F10[Br-Br]   | F10[Br-I]    | F10[Br-B]    | F10[Br-Si]   | F10[Br-X]    |
| F10[I-I]     | F10[I-B]     | F10[I-Si]    | F10[I-X]     | F10[B-B]     |
| F10[B-Si]    | F10[B-X]     | F10[Si-Si]   | F10[Si-X]    | F10[X-X]     |
| G(N..I)      | G(O..I)      | G(S..I)      | G(P..F)      | G(P..Cl)     |
| G(P..Br)     | G(P..I)      | G(F..Br)     | G(F..I)      | G(Cl..I)     |
| G(Br..Br)    | G(Br..I)     | G(I..I)      | Ro5          | cRo5         |
| CATS3D_00_DD | CATS3D_01_DD | CATS3D_02_DD | CATS3D_03_DD | CATS3D_04_DD |
| CATS3D_05_DD | CATS3D_06_DD | CATS3D_07_DD | CATS3D_08_DD | CATS3D_09_DD |
| CATS3D_10_DD | CATS3D_11_DD | CATS3D_12_DD | CATS3D_13_DD | CATS3D_14_DD |
| CATS3D_15_DD | CATS3D_16_DD | CATS3D_17_DD | CATS3D_18_DD | CATS3D_19_DD |
| CATS3D_00_DA | CATS3D_01_DA | CATS3D_02_DA | CATS3D_03_DA | CATS3D_04_DA |
| CATS3D_05_DA | CATS3D_06_DA | CATS3D_07_DA | CATS3D_08_DA | CATS3D_09_DA |
| CATS3D_10_DA | CATS3D_11_DA | CATS3D_12_DA | CATS3D_13_DA | CATS3D_14_DA |
| CATS3D_15_DA | CATS3D_16_DA | CATS3D_17_DA | CATS3D_18_DA | CATS3D_19_DA |
| CATS3D_00_DP | CATS3D_01_DP | CATS3D_02_DP | CATS3D_03_DP | CATS3D_04_DP |
| CATS3D_05_DP | CATS3D_06_DP | CATS3D_07_DP | CATS3D_08_DP | CATS3D_09_DP |
| CATS3D_10_DP | CATS3D_11_DP | CATS3D_12_DP | CATS3D_13_DP | CATS3D_14_DP |
| CATS3D_15_DP | CATS3D_16_DP | CATS3D_17_DP | CATS3D_18_DP | CATS3D_19_DP |
| CATS3D_00_DN | CATS3D_01_DN | CATS3D_02_DN | CATS3D_03_DN | CATS3D_04_DN |
| CATS3D_05_DN | CATS3D_06_DN | CATS3D_07_DN | CATS3D_08_DN | CATS3D_09_DN |
| CATS3D_10_DN | CATS3D_11_DN | CATS3D_12_DN | CATS3D_13_DN | CATS3D_14_DN |
| CATS3D_15_DN | CATS3D_16_DN | CATS3D_17_DN | CATS3D_18_DN | CATS3D_19_DN |
| CATS3D_00_DL | CATS3D_01_DL | CATS3D_02_DL | CATS3D_03_DL | CATS3D_04_DL |
| CATS3D_05_DL | CATS3D_06_DL | CATS3D_07_DL | CATS3D_08_DL | CATS3D_09_DL |
| CATS3D_10_DL | CATS3D_11_DL | CATS3D_12_DL | CATS3D_13_DL | CATS3D_14_DL |
| CATS3D_15_DL | CATS3D_16_DL | CATS3D_17_DL | CATS3D_18_DL | CATS3D_19_DL |
| CATS3D_00_AA | CATS3D_01_AA | CATS3D_02_AA | CATS3D_03_AA | CATS3D_04_AA |
| CATS3D_05_AA | CATS3D_06_AA | CATS3D_07_AA | CATS3D_08_AA | CATS3D_09_AA |
| CATS3D_10_AA | CATS3D_11_AA | CATS3D_12_AA | CATS3D_13_AA | CATS3D_14_AA |
| CATS3D_15_AA | CATS3D_16_AA | CATS3D_17_AA | CATS3D_18_AA | CATS3D_19_AA |
| CATS3D_00_AP | CATS3D_01_AP | CATS3D_02_AP | CATS3D_03_AP | CATS3D_04_AP |
| CATS3D_05_AP | CATS3D_06_AP | CATS3D_07_AP | CATS3D_08_AP | CATS3D_09_AP |
| CATS3D_10_AP | CATS3D_11_AP | CATS3D_12_AP | CATS3D_13_AP | CATS3D_14_AP |
| CATS3D_15_AP | CATS3D_16_AP | CATS3D_17_AP | CATS3D_18_AP | CATS3D_19_AP |
| CATS3D_00_AN | CATS3D_01_AN | CATS3D_02_AN | CATS3D_03_AN | CATS3D_04_AN |
| CATS3D_05_AN | CATS3D_06_AN | CATS3D_07_AN | CATS3D_08_AN | CATS3D_09_AN |
| CATS3D_10_AN | CATS3D_11_AN | CATS3D_12_AN | CATS3D_13_AN | CATS3D_14_AN |
| CATS3D_15_AN | CATS3D_16_AN | CATS3D_17_AN | CATS3D_18_AN | CATS3D_19_AN |
| CATS3D_00_AL | CATS3D_01_AL | CATS3D_02_AL | CATS3D_03_AL | CATS3D_04_AL |

|              |              |              |              |              |
|--------------|--------------|--------------|--------------|--------------|
| CATS3D_05_AL | CATS3D_06_AL | CATS3D_07_AL | CATS3D_08_AL | CATS3D_09_AL |
| CATS3D_10_AL | CATS3D_11_AL | CATS3D_12_AL | CATS3D_13_AL | CATS3D_14_AL |
| CATS3D_15_AL | CATS3D_16_AL | CATS3D_17_AL | CATS3D_18_AL | CATS3D_19_AL |
| CATS3D_00_PP | CATS3D_01_PP | CATS3D_02_PP | CATS3D_03_PP | CATS3D_04_PP |
| CATS3D_05_PP | CATS3D_06_PP | CATS3D_07_PP | CATS3D_08_PP | CATS3D_09_PP |
| CATS3D_10_PP | CATS3D_11_PP | CATS3D_12_PP | CATS3D_13_PP | CATS3D_14_PP |
| CATS3D_15_PP | CATS3D_16_PP | CATS3D_17_PP | CATS3D_18_PP | CATS3D_19_PP |
| CATS3D_00_PN | CATS3D_01_PN | CATS3D_02_PN | CATS3D_03_PN | CATS3D_04_PN |
| CATS3D_05_PN | CATS3D_06_PN | CATS3D_07_PN | CATS3D_08_PN | CATS3D_09_PN |
| CATS3D_10_PN | CATS3D_11_PN | CATS3D_12_PN | CATS3D_13_PN | CATS3D_14_PN |
| CATS3D_15_PN | CATS3D_16_PN | CATS3D_17_PN | CATS3D_18_PN | CATS3D_19_PN |
| CATS3D_00_PL | CATS3D_01_PL | CATS3D_02_PL | CATS3D_03_PL | CATS3D_04_PL |
| CATS3D_05_PL | CATS3D_06_PL | CATS3D_07_PL | CATS3D_08_PL | CATS3D_09_PL |
| CATS3D_10_PL | CATS3D_11_PL | CATS3D_12_PL | CATS3D_13_PL | CATS3D_14_PL |
| CATS3D_15_PL | CATS3D_16_PL | CATS3D_17_PL | CATS3D_18_PL | CATS3D_19_PL |
| CATS3D_00_NN | CATS3D_01_NN | CATS3D_02_NN | CATS3D_03_NN | CATS3D_04_NN |
| CATS3D_05_NN | CATS3D_06_NN | CATS3D_07_NN | CATS3D_08_NN | CATS3D_09_NN |
| CATS3D_10_NN | CATS3D_11_NN | CATS3D_12_NN | CATS3D_13_NN | CATS3D_14_NN |
| CATS3D_15_NN | CATS3D_16_NN | CATS3D_17_NN | CATS3D_18_NN | CATS3D_19_NN |
| CATS3D_00_NL | CATS3D_01_NL | CATS3D_02_NL | CATS3D_03_NL | CATS3D_04_NL |
| CATS3D_05_NL | CATS3D_06_NL | CATS3D_07_NL | CATS3D_08_NL | CATS3D_09_NL |
| CATS3D_10_NL | CATS3D_11_NL | CATS3D_12_NL | CATS3D_13_NL | CATS3D_14_NL |
| CATS3D_15_NL | CATS3D_16_NL | CATS3D_17_NL | CATS3D_18_NL | CATS3D_19_NL |
| CATS3D_00_LL | CATS3D_01_LL | CATS3D_02_LL | CATS3D_03_LL | CATS3D_04_LL |
| CATS3D_05_LL | CATS3D_06_LL | CATS3D_07_LL | CATS3D_08_LL | CATS3D_09_LL |
| CATS3D_10_LL | CATS3D_11_LL | CATS3D_12_LL | CATS3D_13_LL | CATS3D_14_LL |
| CATS3D_15_LL | CATS3D_16_LL | CATS3D_17_LL | CATS3D_18_LL | CATS3D_19_LL |

(2540 categorical features in total)

## Acknowledgements

This study was financially supported in part by Takeda Pharmaceutical Company Limited (COCKPI-T Funding program), and also supported by Takeda researchers K. Hidaka, M. Toyofuku, A. Okabe, K. Imamura, T. Tawaraishi, M. Mochizuki, J. Li, T. Sugimoto for screening compound selection and provision of tangible materials, and by T. Hidaka for acquisition of descriptor data. This study was also supported by IDS (Institute for Datability Science) grant of Osaka University for Y. Matsushita and K. Nakatani.
